## Exploration in the presence of mother in typically and non-typically developing pre-walking human infants 1 2

Frostig, T<sup>1</sup>., Alonim, H<sup>2</sup>., Scheingesicht, G<sup>2</sup>., Benjamini Y<sup>1</sup>., and Golani, I<sup>3</sup>. 3

1. Dept. of Statistics and Operation Research, School of Mathematics, and Sagol School for Neurosciences, Tel Aviv University. 4  
5
2. Mifne Center for Early Treatment of Autism, Rosh Pinna, Israel 6
3. School of Zoology and Sagol School for Neurosciences, Tel Aviv University. 7  
8

### *Abstract* 9

Using an arsenal of tools previously developed for the study of origin-related 10  
exploration in animals, we compared exploration of human pre-walking Typically- 11  
Developing (TD) and Non-Typically Developing (NTD) infants in the presence of 12  
mother. The NTD infants had been referred to a center for the treatment of autism by 13  
pediatric neurologists and expert clinicians. Using computational analysis we document 14  
in TD infants a phylogenetic ancient behavior: origin-related exploration. Strikingly, 15  
while the TD infants exhibited excursions in reference to mother and deep engagement 16  
with mother when visiting her, the NTD infants tended to avoid mother's place, 17  
performing few if any excursions, and exhibiting shallow engagement with mother. 18  
Given the pervasiveness of origin-related exploration in invertebrates, vertebrates, and 19  
primates, we now face a challenge to find an animal model that will exhibit active 20  
exploration while ignoring or suppressing the return to the origin, be it a mother or any 21  
other safe haven. 22

### *Main* 23 24

In this study we sought to establish the generative rules that shape the path traced 25  
by human pre-walking infants in moment-to-moment exploration of a novel 26  
environment, under the protective attention of the infant's relatively stationary mother. 27  
Our perspective comprised three traditionally distinct fields of study: that of animal 28  
exploratory behavior, that of primate- and that of human mother-infant interaction. 29

A conspicuous spatial regularity in the exploratory behavior of many organisms is 30  
that of a reference place in relation to which they explore the environment. In the wild, 31  
many animal species have a home site to which they return regularly after exploring 32  
their home range or territory, be they, for example, wolves (Fritts & Mech 1981), small 33  
mammals (Brown 1966), ants (Martin & Rudiger 1988) bumble bees (Woodgate et al. 34

2016), or millipedes (Hoffmann 1984). In behavioral neuroscience experiments, rats 35  
have been shown to explore the experimental arena from a reference place, from which 36  
they perform excursions into the environment (Eilam & Golani 1989). The high 37  
accumulation of time spent across a large number of visits also characterizes the 38  
reference place of, for example, mice (Fonio et al. 2009), zebra fish (Stewart et al. 39  
2010; Stewart et al. 2011), and infant rats (Loewen et al. 2005). This reference place, 40  
often termed a "home base", exerts its influence on the organism's behavior across the 41  
entire exploratory basin. Visits to the home base partition the path into separate 42  
excursions in the environment. The latter are further partitioned into progression 43  
segments and staying-in-place (lingering) episodes (Drai & Golani 2001). In moment- 44  
to-moment behavior in a novel environment the excursions grow in extent (Benjamini 45  
et al. 2011) and differentiate from simple excursions to complex ones (Benjamini et al. 46  
2011). 47

The performance of exploratory excursions has also been reported in the wild in 48  
infant primates – rhesus monkeys (Berman 1980), baboons (Altmann & Samuels 1992), 49  
and chimpanzees (van de Rijt-Plooij & Plooij 1987). As the infants of these primates 50  
develop, they perform increasingly longer excursions from mother into the environment 51  
and back to mother. While the mother is often on the move during the performance of 52  
such excursions, the excursions nevertheless involve both exploration and active 53  
management of distance in reference to an origin or base by the infant, be it a mobile 54  
or stationary mother. 55

Origin-related exploration has also been described in human infants: reinforcing 56  
Bowlby's attachment theory with ethological data, Ainsworth observed that human 57  
infants "tend to explore on their own initiative an unfamiliar room in their mother's 58  
presence, and in doing so use mother as a secure base" (Ainsworth & Bowlby 1991; 59  
Ainsworth 1969). Similarly, Mahler's psychoanalytic separation-individuation theory 60  
on the psychological development of the human infant is largely supported by 61  
observations of the infants' "incessant wandering away" and "checking back to mother", 62  
using mother as reference and "home base" (Mahler et al. 1975). Human infant 63  
performance of increasingly longer exploratory excursions from a stationary mother 64  
has also been reported previously (Rheingold & Eckerman 1970), and in one study also 65  
plotted (Vitelson 2005). 66

The current report presents the kinematics on a moment-by-moment actual-genesis 67  
scale, enabling a computational comparison across taxonomic groups of the rules that 68  
shape an organism's path. The study is complementary to the majority of infant mother- 69  
related exploration studies, which consist of verbal reports of behavior, or reports of 70  
inferred intrapsychic processes, such as symbiosis (Mahler et al. 1975), separateness<sup>20</sup>, 71  
identity (Stern 2009), self, object relationships, or separation anxiety (Ainsworth 1969), 72  
on a day-by-day or month-by-month developmental scale (Jones 1972; Rheingold & 73  
Eckerman 1970). 74

The current study sought to formulate some of the rules that shape mother-related 75  
exploration in pre-walking human infants, using a description that discloses the infant's 76  
engagement with the environment surrounding it. To obtain a wider perspective on the 77  
behavior of Typically-Developing (TD) infants, we compared the behavior of six TD 78  
infants to that of six Non-Typically Developing (NTD) infants referred to the Mifne 79  
Center for the assessment and Treatment of Autism (Alonim 2004) - three infants were 80  
referred for developmental assessment by expert clinicians and three were referred for 81  
treatment by pediatric neurologists. All the NTD infants had primary assessment due to 82  
parental concerns regarding their infants' development. 83

We perceived a potential byproduct of this comparison as highlighting those behavioral 84  
symptoms that could later be looked for in prospective animal models of this subgroup 85  
of NTD infants. 86

We found that origin-related exploration was weak or even absent in the NTD 87  
infants. This finding is perhaps not unexpected from the perspective of attachment 88  
theory; it is, however, surprising from a phylogenetic perspective, given the 89  
pervasiveness of origin- and mother-related exploration across primates, vertebrates, 90  
and even arthropods. 91

Our results provide a comparative phylogenetic perspective, a glance into a 92  
conserved, relatively universal structure preceding specific functions it fulfills in 93  
human infants, and a glimpse into the distinct operational worlds of the TD and a sub 94  
group of NTD infants, and into the ways in which they attend to the world and come to 95  
grips with it. We thus start with animals, proceed to human infants and aim at returning 96  
to animals. 97

98

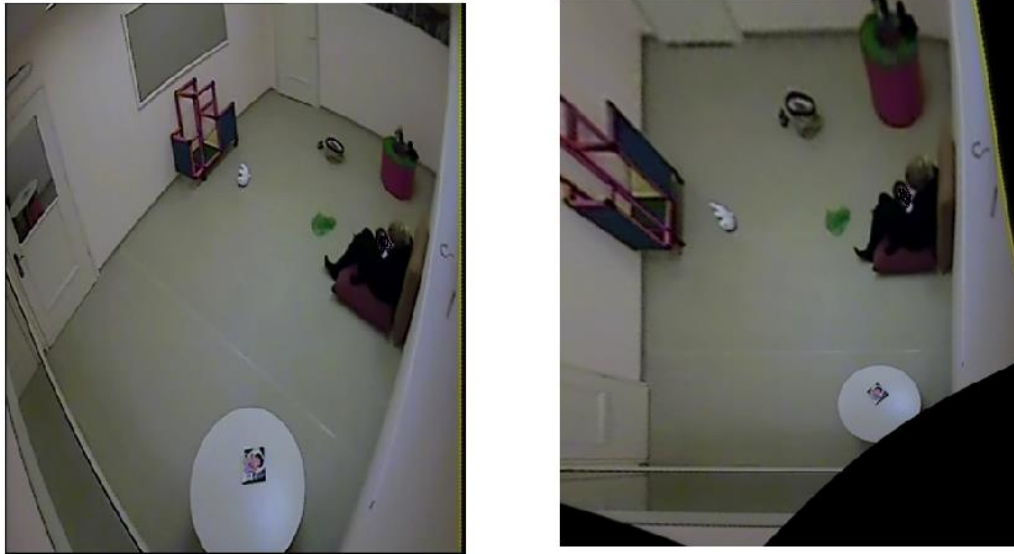

99

**Figure 1.** The Mifne Treatment room image, before (left) and after transformations (right). 100  
Note furniture, toys, mother's location (here with infant sitting on her lap), on the right side near 101  
the wall), and two doors (on the left – exit doorway and on top door leading to bathroom). 102

*Dwell time distribution across the room* 103

This study was conducted on pre-walking infants at the stage of stable crawling. The 104  
infants were recruited with their respective mothers to participate in a video-taped half- 105  
hour session conducted in a medium-sized room. In each trial the mother entered the 106  
room carrying her infant, sat on a mattress near the wall, and then seated the infant or 107  
let it slide down next to her. The mother was requested to remain seated and allow the 108  
infant to act freely for a 30-minutes session. Two video cameras were used across the 109  
session: one capturing a view of the whole room including the infant and the mother 110  
(fig. 1); and another zooming in on the infant and following it. The behavior of the 111  
infant and the mother was video-taped and then tracked for half an hour, a period that 112  
had been found to be appropriate in our preliminary study (see *Methods*). 113

Figures 2a, b present for both the TD and NTD infants the smoothed cumulative dwell- 114  
time spent in different locations across the observation room and the number of visits 115  
paid by them to those neighborhood locations exhibiting peak dwell times (see 116  
*Methods*). Dwell-time is represented by colored contour lines forming a topographical 117  
map. A comparison of, for example, the TD infant Alon with the NTD infant Tom (all 118  
names provided in this study are fictitious), reveals that, in both, dwell time displays a 119  
patchy distribution across the room. However, whereas for Alon there was a single 120  
peak, located near mother, which stood out in terms of dwell-time (signified by a yellow 121

center), for the NTD infant Tom there were two peaks of relatively the same dwell-time 122  
and both were located away from mother. Alon spent time over the whole room whereas 123  
Tom adhered to the upper half, hardly lingering in the lower half of the room. Similar 124  
differences were revealed for most of the infants in the respective groups: all the TDs 125  
exhibited a single preferred place in terms of dwell-time, whereas the NTDs (except for 126  
two: Yuri and Dean) exhibited more than one peak dwell-time place. In all the TDs 127  
except for one (Alexey, who also exhibited several NTD features; see Method's 128  
section), the peak dwell-time place was located by mother, whereas in all NTDs it was 129  
located away from mother. 130

Whereas the TD infants tended to establish preferred places also near furniture (Alon 131  
by the cabinet, table, and basket; Omri by the cylinder and table; Yoram and Dan by 132  
the cylinder; and Alexey by the cabinet and the exit door), the NTDs often established 133  
places away from both walls and furniture. Five of the NTD infants (Evyatar, Tom, 134  
Dean, Yuri, and Shuval) established peak dwell-time places in the open space facing 135  
their mother, but without returning to her. One NTD infant (Shuval) and one TD 136  
(Alexey), established peak dwell times *vis-à-vis* the door leading out of the room, 137  
perhaps disclosing an intention to leave the room. 138

While the TDs tended to cover the whole room (including Dan, whose extended staying 139  
with mother dwarfed other staying-in-place episodes across the room; see also 140  
animations), the NTDs tended to adhere to only part of the room (See *Endpoint* 141  
*Summaries* - % room covered): Adva to about a third of the room, completely ignoring 142  
the other parts; Dean to the center part of the room *vis-à-vis* mother, ignoring all other 143  
parts; Evyatar first in the lower part of the room and then spending all his peak dwell- 144  
times in a horseshoe-shaped strip *vis-a-vis* mother, ignoring the rest of the room; and 145  
Shuval ignored the right half of the room. Of the NTDs, only Yuri covered most of the 146  
room and this appeared to be due to his chasing a large rolling ball for most of the 147  
session. 148

*Visit distribution across high dwell-time places:* Figures 2a, b provide a spatio-temporal 149  
summary of the process by which dwell time was *allocated* across the session to the 150  
main places. The stars on top of the peak places represent the number, order, and 151  
duration of the visits to the respective peak dwell-time places. Starting at 12 o'clock, 152  
the circumference represents the session's half-hour duration. Proceeding clockwise, 153  
each wedge presents a visit to this location, with its start and end times given by the 154

orientation, and its duration thus presented by the arc's length. For very short visits the wedge appears as a single spoke. Almog (TD), for example, visited the most preferred place, located by his mother, 14 times, thus paying the highest number of visits to the place near mother and accumulating time near mother in a piecemeal manner, whereas Dean (NTD) visited his most preferred place only 3 times, ignoring that place for a third of the session and visiting mother only twice. These differences in visit management apply between most of the two groups of infants: all TDs except for Alexey (whose peak visiting place was the exit doorway) most visited place was near mother for the highest number of times; whereas all the NTDs' most visited places were located away from mother and each was typically ignored for substantial parts of the session. In short, the NTD infants did not show sustained attention to any place, or object as expressed in spread-across-the-session visits. In both groups visits to most places (except the TD infant mothers' places) were sparse and not evenly distributed. Both Alexey (TD, but see *Methods*) and Shuval (NTD) paid the highest number of visits to the exit doorway. It should be noted that the number of visits to peak dwell-time places does not exhaust the number of visits to mother, and therefore does not disclose the full number of excursions performed from the mother; these visits merely refer to one or at most two places in her vicinity. The infants might, and indeed did, visit mother's vicinity from other, less visited directions, not necessarily belonging to the peak dwell time places.

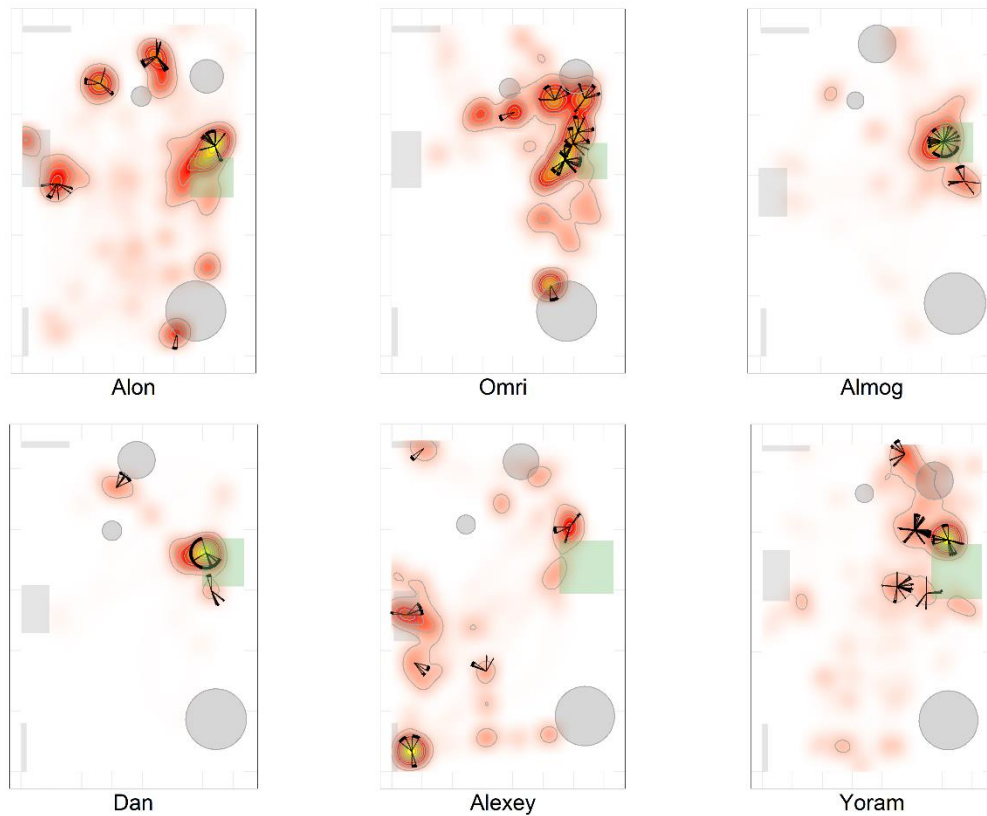

174

**Figure 2 a.** The TD infants' most preferred place was located near mother and they visited it regularly paying it the highest number of visits. The figure presents the smoothed cumulative dwell-time spent in different locations across the observation room, and the number of visits paid by the infants to neighborhood locations exhibiting peak dwell-times. Number of visits is obtained using the two concentric circles method ( $r_{in} = 30cm$ ,  $r_{out} = 50cm$ , see *Methods*). Dwell-time is represented by colored contour lines forming a topographical map. The contour lines are spaced at the quantiles (0.1, 0.2, 0.3, ...) of the smoothed cumulative dwell-time (see *Methods*). Note that in these heat maps the color is proportional to the dwell time of each specific infant.

175

176

177

178

179

180

181

182

183

184



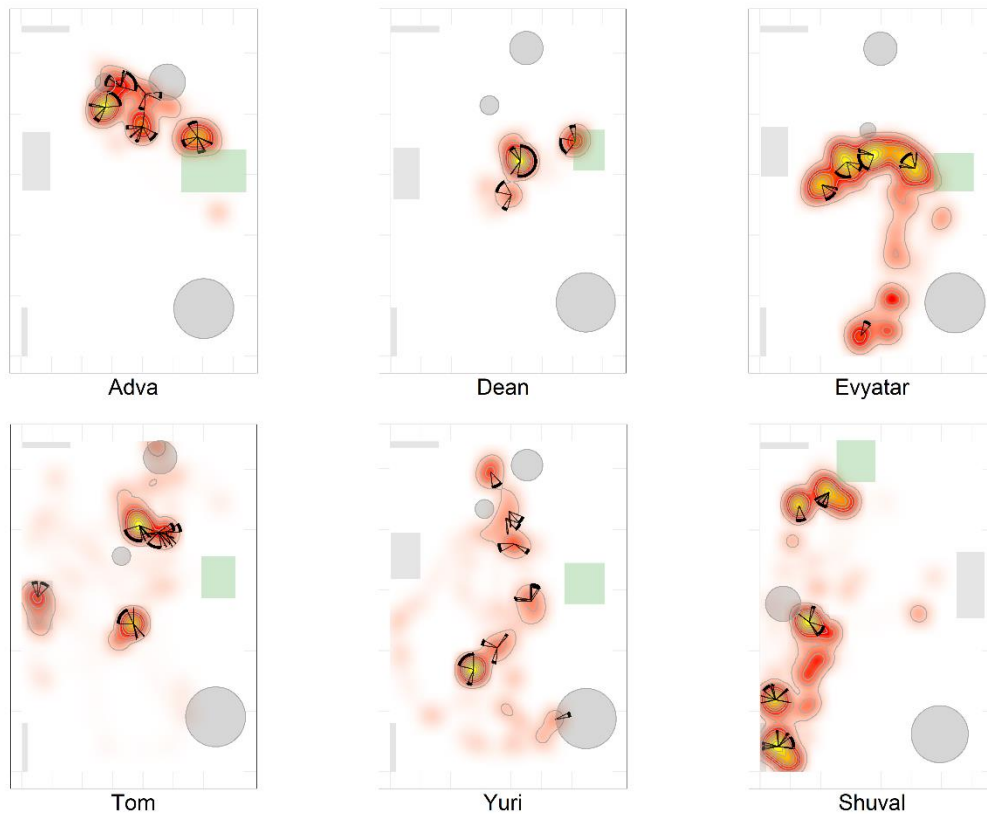

**Figure 2 b.** The NTD infants' most preferred places were not located near mother and the infants did not visit these places regularly, nor necessarily paying to them the highest number of visits. For further explanation see Figure 2a.

The stable preference of the TD infants for the place located near the mother and the absence of a preferred place near the NTD infants' mother (fig. 2a, b) marks the significance of the TD mothers' location for the behavior of the TD infants, thus requiring an examination of all the infants' path-sessions in explicit reference to mother's location (See *Endpoint Summaries* - # of excursions and % time spent near mother).

*The itinerary, duration, and extent of engagement of the infants' visits to mother.*

We plotted in the correct order, across the whole session, the relative time of start, the relative time of end, the duration in session percentages, and the extent of engagement by the infant when in mother's proximity, noting whether the infant merely approached mother during a specific visit; Whether it touched her; and Whether it climbed on her (see *Methods*). As shown, Alon (TD, fig. 3a) visited mother ca. 12 times, sometimes only approaching her and at other times climbing on her; whereas Tom (NTD, fig. 3b) spent the first few seconds at the very start of the session near mother and then later slightly approached her three times. More generally, five of the TD infants (Alon, Omri, Yoram, Almog, and Dan) came to close, extended, and persistent grips with mother,



whereas all the NTD infants either avoided mother's proximity (Tom and Yuri), or 205  
avoided visiting her for extended parts of the session (Dean, Evyatar and Shuval). Adva, 206  
an NTD infant, did visit mother, but only four times. Note that in 5 TD (Alon, Omri, 207  
Almog, Dan, and Yoram) and 2 NTD (Adva and Dean) infants the last extended visit 208  
involved, using Mahler's description (Mahler et al. 1975), "melting into mother". The 209  
difference in the extent of engagement with mother is also evident in the plots presented 210  
in figure S1 of both the average percent time spent, and the number of visits paid at 211  
distances starting from zero centimeters from the center of her location (fig. S1). 212

213

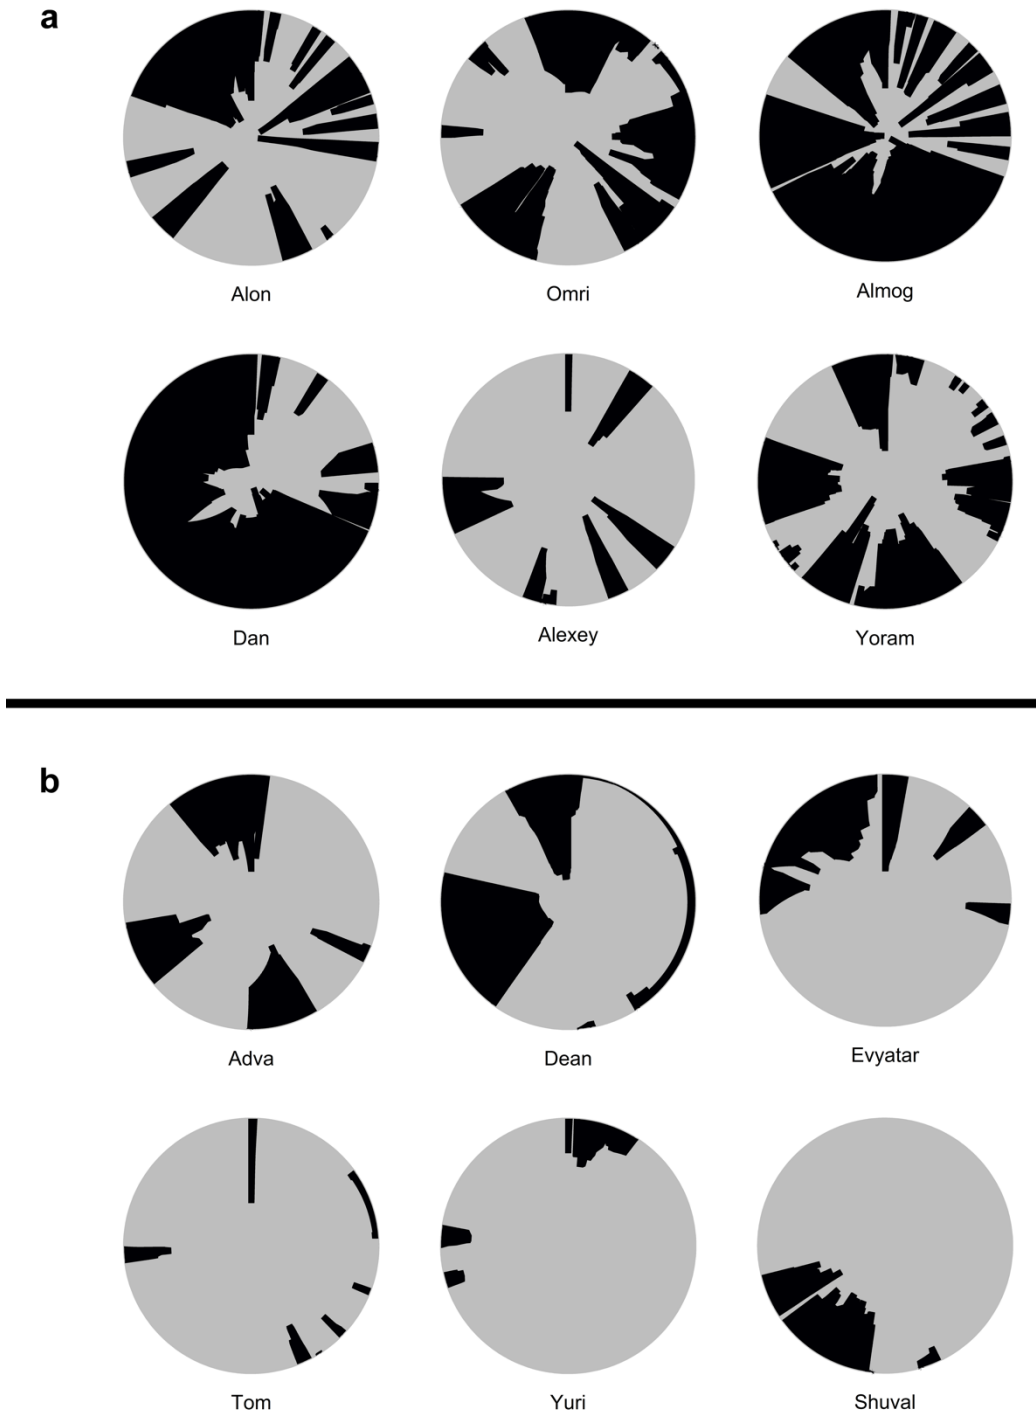

**Figure 3.** The TD infants (a) visit mother frequently and persistently, engaging her deeply and for long durations, whereas the NTD infants (b) visit mother rarely if at all; and when visiting they typically merely approach and do not touch mother. The engagement plots exhibit the timing, duration, and extent of the infant's being in gear with mother. The concentric circles are centered on mother's location, spanning a radius of hundred and twenty cm around that center. Starting at twelve o'clock and proceeding clockwise for the session's duration, the arc traced on the circle's circumference and the colored section of the circle designate the times of start, end, and duration, and the extent of engagement with mother's proximity.

214

215

216

217

218

219

220

221

222

223

*The itinerary, duration, and extent of engagement of the infants' visits to furniture in the room.* 224  
225

Figure 4a, b presents plot summaries of the extent of engagement of each of the infants 226  
with mother, with the four items of furniture in the room, and with the two doorways 227  
leading out of the room: how each of the infants comes to grips with structures in the 228  
environment, and to what extent they come to grips with mother. 229

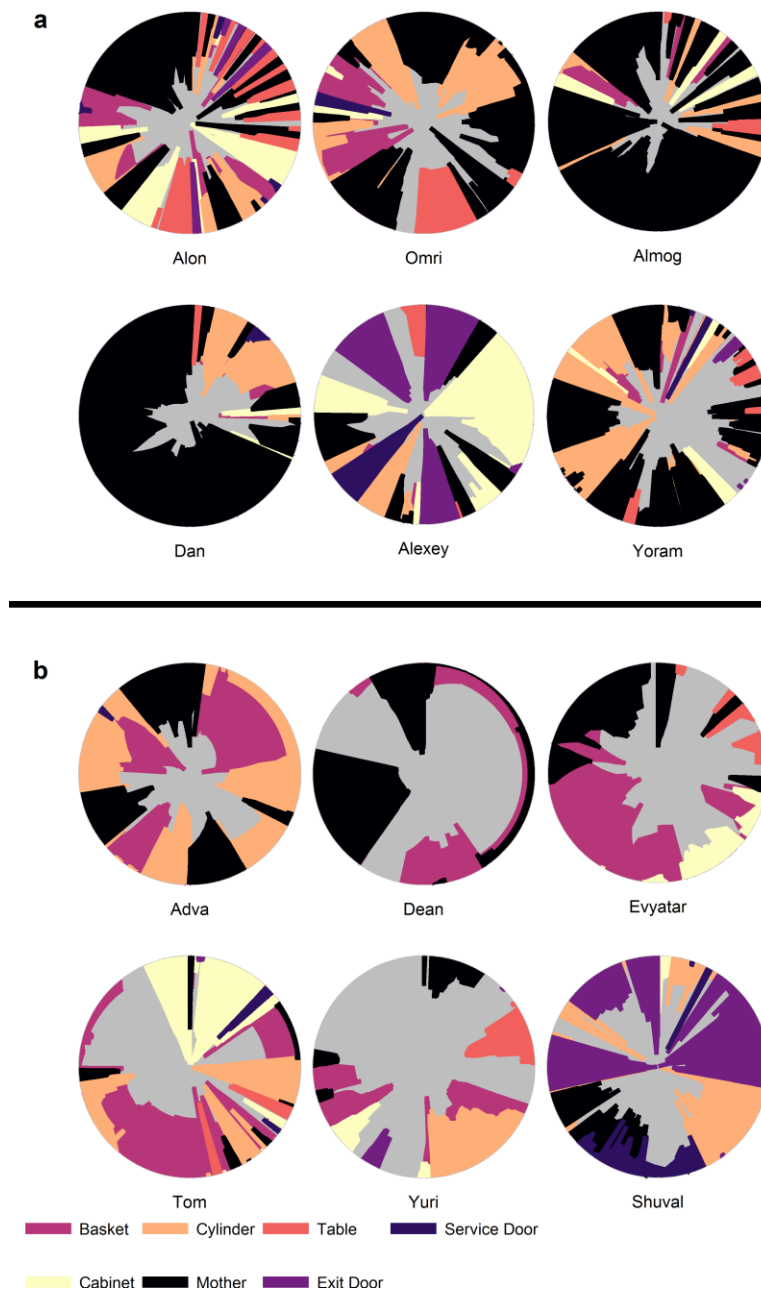

**Figure 4.** The TD infants visited mother and the furniture items frequently and persistently, 231  
invading their respective places deeply and for long durations. **b** The NTD infants' visits to 232  
mother and to the furniture were infrequent and shallow. For explanation of graphs see legend 233  
to Figure 3. 234

235

As in Figures 3a, b, starting at 12 o'clock and proceeding clockwise, all the visits paid 236  
by each of the infants to these items of furniture are plotted in their order of 237  
performance, including the relative start and end times, and the extent of engagement 238  
exhibited in each of the visits. Generally speaking, the TD infants' engagement agendas 239  
were much more eventful and dynamic than those of the NTD infants (evidenced by 240  
the number and variety of colored sections tiling the circles: multiple sharp spikes that 241  
touch the center in TDs (Almog, Dan, and Alon), versus a few extended sections of 242  
only a few colors that do not reach the center at all in NTDs (Adva, Dean, Evyater and 243  
Yuri). i) The TD infants visited multiple items of furniture, paying multiple visits to 244  
each; whereas the NTD infants visited the furniture much less frequently. ii) As 245  
evidenced by the extent of colored areas near the circles' centers, the TD infants 246  
approached and often made contact with the furniture, whereas the NTD infants tended 247  
to approach the furniture less closely and engaged with it less deeply. iii) The large gray 248  
empty spaces in the NTD engagement graphs disclose the tendency of the NTD infants 249  
to sometimes adhere to places that were distant from the furniture, either engaging in 250  
stereotypies or engaging with a toy, or perhaps attending to themselves rather than to 251  
the environment. Adva was exceptional in the NTD group in visiting mother at regular 252  
intervals, albeit only for four visits. Two infants, Alexey and Shuval, paid multiple 253  
visits to the doorway leading out of the room, trying to open it, perhaps intending to 254  
leave. The engagement graphs also highlight significant within-group differences: e.g., 255  
while Almog alternated between visits to mother and single visits to an object across 256  
the session, Alon visited several items of furniture between successive visits to mother. 257  
The TDs took longer rests with mother, whereas the NTDs took longer rests near 258  
furniture. 259

*The infants' management of distance from mother.* 260

We parsed the infant's path into excursions by using the zero crossing of the infant's 261  
path with the horizontal line marking the boundary occupied by mother's customized 262  
place (see *Methods*). Thereby, touching, or crossing the line on the way down or on the 263  
way up defines a visit to mother. A segment of the path located above the horizontal 264  
line and bounded by two zero crossings defines an excursion. As demonstrated in 265  
Figure 5a, the most noticeable feature of the TDs exploratory path is its partitioning 266  
into excursions. Four of the TD infants (Alon, Almog, Dan, and Yoram) started the 267  
session with short duration excursions (marked by sharp peaks) and then proceeded to 268

excursions involving extended lingering episodes (marked by flat-topped peaks). All 269  
(except Alexey) ended the session by cuddling on mother's lap. 270

In contrast, the NTD infants (Fig. 5b) performed very few if any excursions from 271  
mother (the difference is 8.5 Wilcoxon rank test p-value 0.005): Adva performed four 272  
excursions ending up on mother's lap; Dean did not visit mother for most of the session, 273  
climbing on her lap for nursing only during the last part of the session; Evyatar started 274  
the session with two excursions, but then avoided mother until the end of the session 275  
when he climbed on her to nurse; Tom established a place at a distance, vis-à-vis 276  
mother, which he visited several times, sitting there, facing mother, and performing 277  
stereotypic behavior without approaching her – as though there was an invisible glass 278  
wall between them; Yuri started the session with three incipient excursions (not 279  
captured by the algorithm) and then avoided mother for the entire session, chasing a 280  
ball, and ending the session by lying on his belly and crying in the middle of the room; 281  
and Shuval remained at a distance from mother for half of the session, visited mother 282  
only twice during the second half of the session, and spent a lot of time near the exit 283  
doorway, ending the session by crying by the doorway. 284

285

286

287

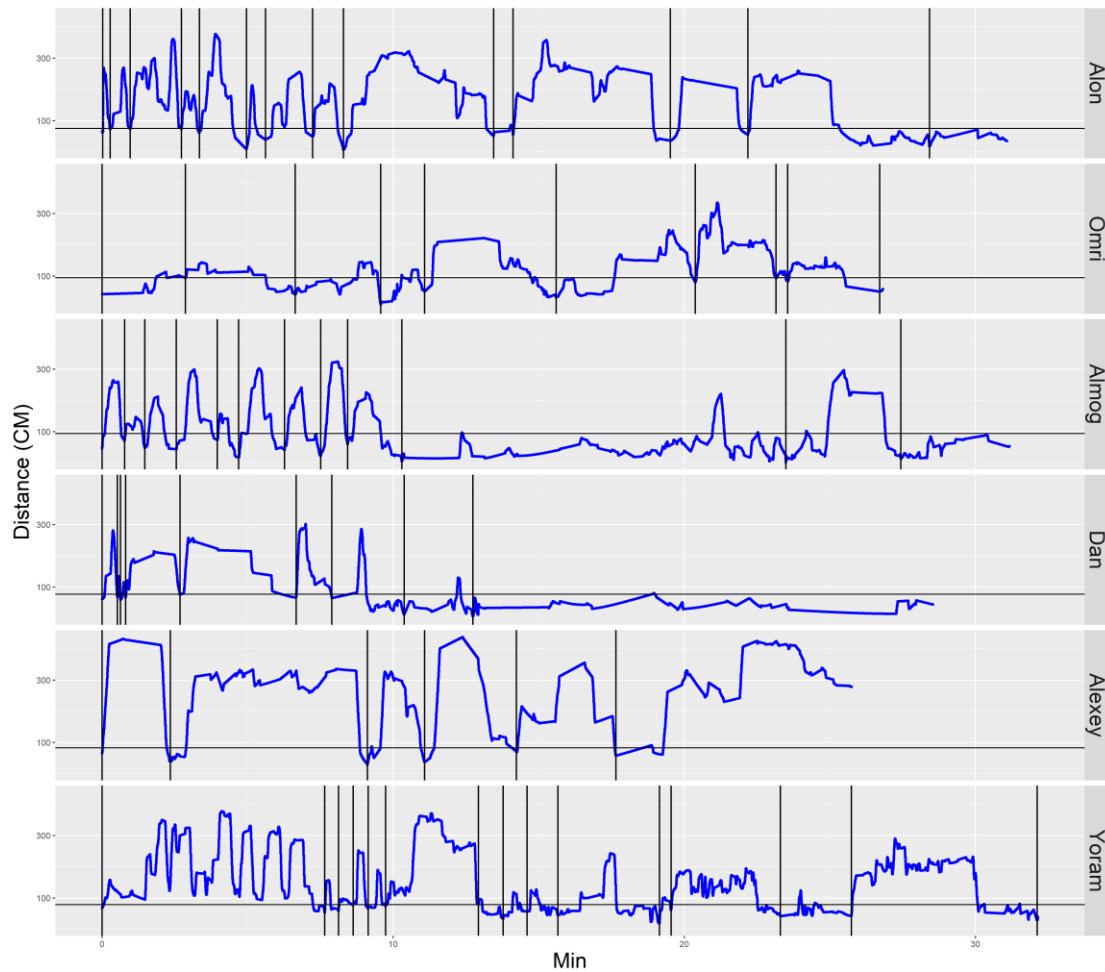

**Figure 5 a.** A plot of the TD infants' management of distance from mother highlights the multiple, repetitive outbound-inbound motion, the extent of engagement with mother (sections below the horizontal line), and a tendency to start the session with sharp peaks (short durations of staying at the far end of excursions) and continue with flat-topped peaks (extended durations of staying at the far end of excursions; Alon, Almog, Dan, and Yoram). Alexey, exhibiting several features of the NTD infants, is an exception, starting the session with an extended flat-topped peak (see *Methods*). Blue line plots distance from mother, black horizontal line marks mother's customized boundary, and black vertical lines segment the plot into excursions.

288  
289  
290  
291  
292  
293  
294  
295  
296

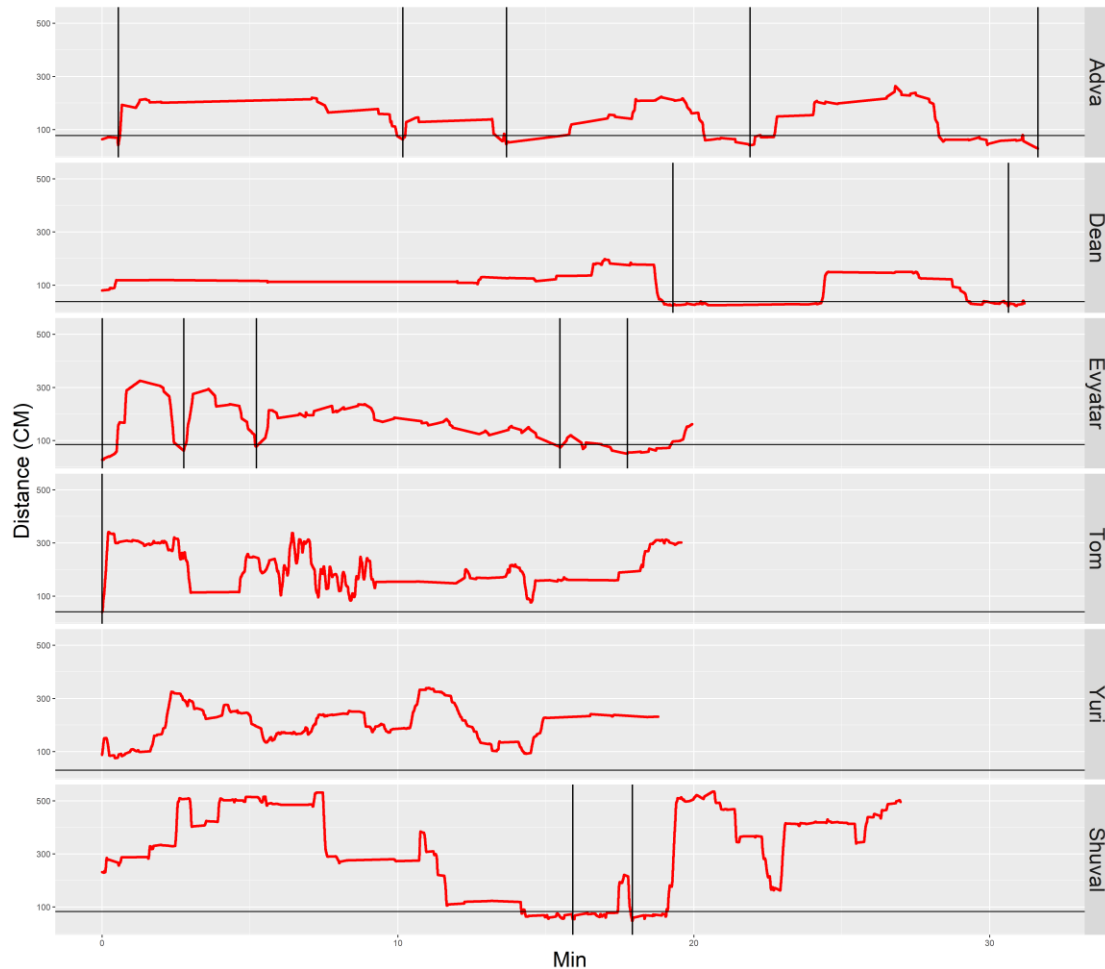

**Figure 5 b.** A plot of the NTD infants' management of distance from mother highlights few if any visits to mother, shallow engagement with the mother (hardly any sections below the horizontal line), and a tendency to start the session with flat-topped peaks (long durations of staying at a specific distance, indicating long staying in place episodes). Only three of the infants end the session on mother's lap. Red line plots distance from mother, black horizontal line marks mother's customized boundary, and black vertical lines segment the plot into excursions.

The NTD plots are characterized by long straight lines that maintain a relatively fixed distance in reference to the mother's location line, indicating that these infants are slow (See *Endpoints Summaries* – progression speed), walking away from mother and staying away for long durations whereas the TDs bounce back and forth across the y-axis, being more dynamic (See *Endpoints Summaries* –speed outside of mother's vicinity). It should also be noted that the maximal distance from mother is much higher in the TDs, except for Shuval whose mother is located, unlike all the other mothers, at the opposite end of the room (see Fig. 2b).

297

298

299

300

301

302

303

304

305

306

307

308

309

310

311

312

313

314

315

316

317

318

319

320

321

322

323

324

325

326



315

*Physical contact with mother.*

316

Although visits to mother do not necessarily imply physical contact, a major difference

317

between the TD and NTD infants was the amount of physical contact they established

318

with their mother (See *Endpoints Summaries* – contact episodes and % of contact time).

319

All the TD infants except for Alexey ended the session with a relatively long contact

320

episode. In the NTD group only two infants ended the session that way. The other four

321

infants ended the session by staying in place away from mother. It should be noted that

322

some of the short physical contact episodes were initiated by the mothers, who leaned

323

forward and established physical contact with their nearby passing infant.

324

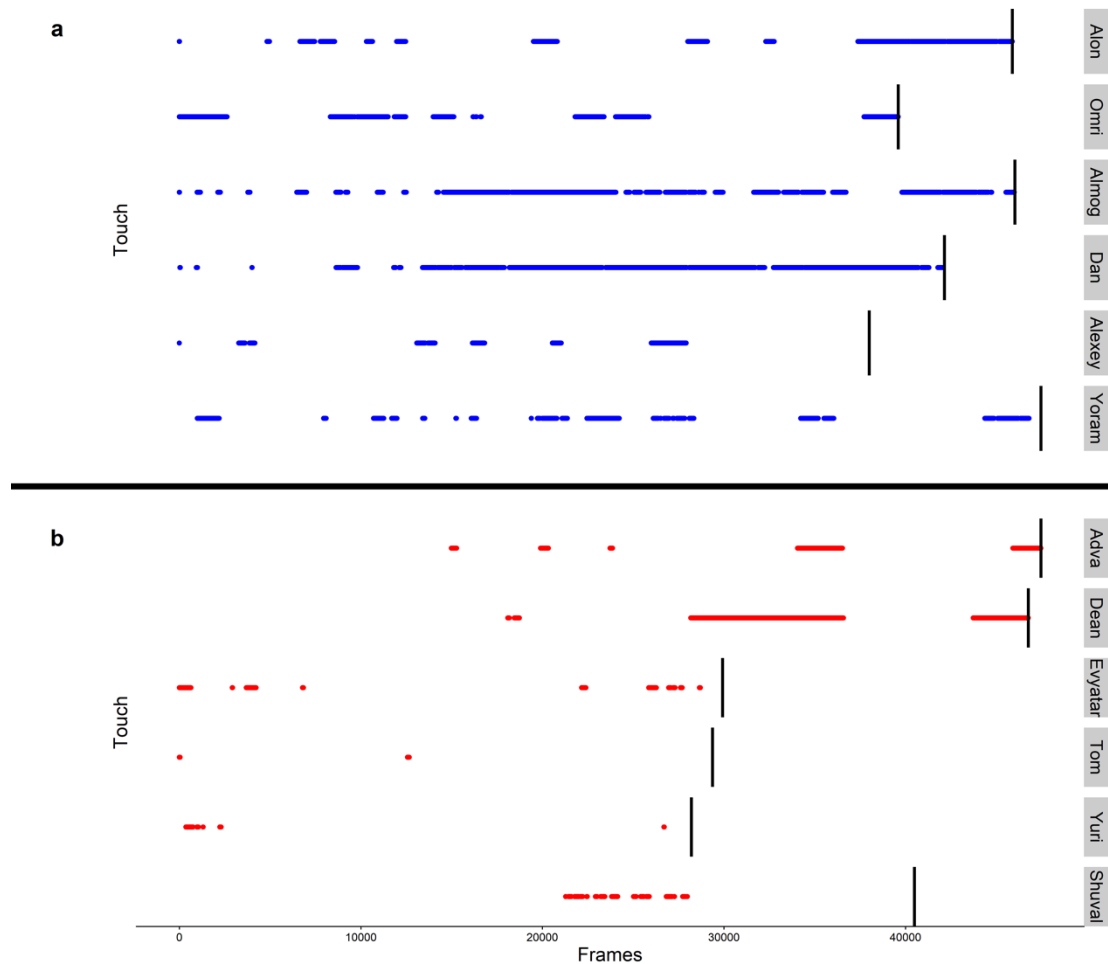

**Figure 6.** The duration and frequency of episodes involving physical contact with the mother were high in the TD infants and low or almost absent in the NTD infants. The vertical black lines represent the end of the respective infant's session.

325

326

327

328

329

*Endpoint Summaries.*

330

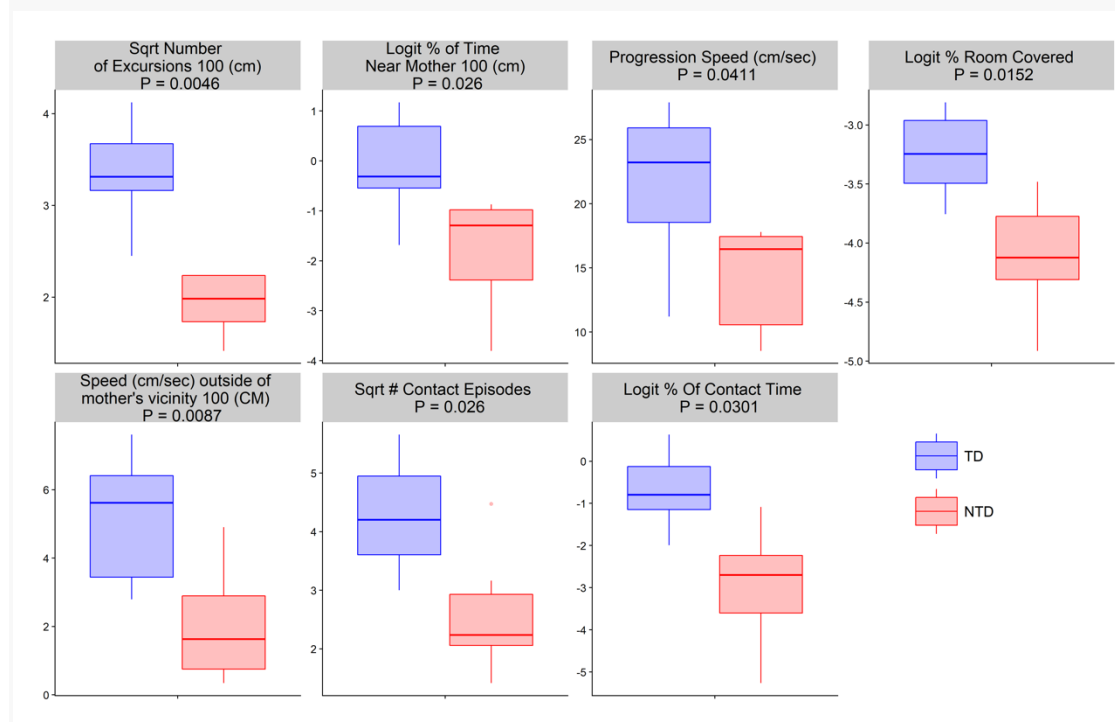

331

**Figure 7.** Boxplot summaries demonstrate significant differences between the TD and NTD infants' behavioral endpoints. All comparisons were conducted using Wilcoxon rank test (requires no assumption regarding the underlying data distribution). Across all endpoints the differences between the TD & NTD infants are significant (at significance level 0.05) after correction for multiple comparisons (Benjamini & Hochberg 1995). The comparison between the number of excursions and % dwell time is dependent on the radius that defines the mother's location. The difference remains robust to changes in that radius (see Fig. S1 and associated text in *Supplementary Information*).

332

333

334

335

336

337

338

339

340

*Excursions versus one un-partitioned path.*

341

The animations presented below demonstrate the partitioning of the path into excursions in two selected TD infants.

342

343

Animation: [Partitioning of Almog's path into excursions](#) (TD infant)

344

Animation: [Partitioning of Alon's path into excursions](#) (TD infant)

345

Animations of similar partitioning of the paths of all the other TD infants are presented in the supplementary material (S. videos 1-6). The TD infants exhibit a highly mother-centered organization involving excursions with clear outbound and then clear inbound portions.

346

347

348

349

The animations of the paths of two selected NTD infants presented below illustrate how the NTD paths tend to avoid mother's place.

350

351

|                                                                                                                                                                                                                                                                                                                                                                                                                                                                                                                                                                                                                                                                                                                                                                                                                                                                                                                                                                                                                                                                                                                                                                                                                                                                                                                                                                                                                                                                                                                                                                                                                                                                                                                                                                                                                                                                                              |                                                                                                                                                        |
|----------------------------------------------------------------------------------------------------------------------------------------------------------------------------------------------------------------------------------------------------------------------------------------------------------------------------------------------------------------------------------------------------------------------------------------------------------------------------------------------------------------------------------------------------------------------------------------------------------------------------------------------------------------------------------------------------------------------------------------------------------------------------------------------------------------------------------------------------------------------------------------------------------------------------------------------------------------------------------------------------------------------------------------------------------------------------------------------------------------------------------------------------------------------------------------------------------------------------------------------------------------------------------------------------------------------------------------------------------------------------------------------------------------------------------------------------------------------------------------------------------------------------------------------------------------------------------------------------------------------------------------------------------------------------------------------------------------------------------------------------------------------------------------------------------------------------------------------------------------------------------------------|--------------------------------------------------------------------------------------------------------------------------------------------------------|
| Animation: <a href="#">Partitioning of Yuri's path into excursions</a> (NTD infant)                                                                                                                                                                                                                                                                                                                                                                                                                                                                                                                                                                                                                                                                                                                                                                                                                                                                                                                                                                                                                                                                                                                                                                                                                                                                                                                                                                                                                                                                                                                                                                                                                                                                                                                                                                                                          | 352                                                                                                                                                    |
| Animation: <a href="#">Partitioning of Tom's path into excursions</a> (NTD infant)                                                                                                                                                                                                                                                                                                                                                                                                                                                                                                                                                                                                                                                                                                                                                                                                                                                                                                                                                                                                                                                                                                                                                                                                                                                                                                                                                                                                                                                                                                                                                                                                                                                                                                                                                                                                           | 353                                                                                                                                                    |
| Animations of similar, half-hour, un-partitioned paths of all the other NTD infants are presented in the Supplementary Material (S. videos 7-12). The NTD infants tend to avoid visits to mother.                                                                                                                                                                                                                                                                                                                                                                                                                                                                                                                                                                                                                                                                                                                                                                                                                                                                                                                                                                                                                                                                                                                                                                                                                                                                                                                                                                                                                                                                                                                                                                                                                                                                                            | 354<br>355<br>356                                                                                                                                      |
|                                                                                                                                                                                                                                                                                                                                                                                                                                                                                                                                                                                                                                                                                                                                                                                                                                                                                                                                                                                                                                                                                                                                                                                                                                                                                                                                                                                                                                                                                                                                                                                                                                                                                                                                                                                                                                                                                              | 357                                                                                                                                                    |
| <b><i>Discussion</i></b>                                                                                                                                                                                                                                                                                                                                                                                                                                                                                                                                                                                                                                                                                                                                                                                                                                                                                                                                                                                                                                                                                                                                                                                                                                                                                                                                                                                                                                                                                                                                                                                                                                                                                                                                                                                                                                                                     | 358                                                                                                                                                    |
| <i>Classical infant-mother studies:</i> Most classical researchers of human infant mother-related exploration prioritize the analysis of its functional aspects, engaging with psychotherapy (Stern 2009), psychoanalytic theory (Mahler et al. 1975), or the study of an infant's emotional life (Bowlby 2012), currently also in correlation to neural maturation (Schoore 2015). This includes, for example, the study of attachment (Ainsworth & Bowlby 1991; Solomon & George 1999; Bowlby 2012), detachment (Rheingold & Eckerman 1970), separation-individuation in the infant's intrapsychic life (Mahler et al. 1975), sense of infant's self (Stern 2009), and inter-subjectivity (Trevarthen 1979). As such, these studies typically attend to multi-dimensional categorical prototypes involving expert evaluation, such as secure or insecure relationships (Solomon & George 1999), as well as to key episodes disclosing emotion and attention (Stern 2009). Using the researcher's own free-floating attention "the psychoanalytic eye lets itself be led wherever the actual phenomenological sequences lead" (Mahler et al. 1975), ignoring spatiotemporal continuity. Whether reporting selectively or scoring in real time or from video, the classical researcher's attention is typically attracted to the mother's and infant's face and hands, describing head movement, gaze, facial expression episodes, crying, vocalizing, and manual manipulation of objects (e.g., (Stern 2009; Mahler et al. 1975)), leaving the study of the structure of whole body movement, which carries along the head and the hands across the environment, to studies of locomotion (e.g., (Soska et al. 2010)) and exploration, who do not necessarily focus on the mother-infant interaction (e.g., (Gibson 1988; Kretch et al. 2014; Kretch & Adolph 2017; Adolph & Berger 2007)). | 359<br>360<br>361<br>362<br>363<br>364<br>365<br>366<br>367<br>368<br>369<br>370<br>371<br>372<br>373<br>374<br>375<br>376<br>377<br>378<br>379<br>380 |
| <i>"Structure-first" versus "function-first" paradigms:</i> Developmental psychologists aim at high level functions like intimacy and enduring emotional bonds. They would caution that even a temporary disregard of the infant's attachment type may distort the                                                                                                                                                                                                                                                                                                                                                                                                                                                                                                                                                                                                                                                                                                                                                                                                                                                                                                                                                                                                                                                                                                                                                                                                                                                                                                                                                                                                                                                                                                                                                                                                                           | 381<br>382<br>383                                                                                                                                      |

interpretation of exploratory behavior (Cooper et al. 2011; Ainsworth et al. 2015). They 384  
might even require that a study of the strange situation would precede the study of the 385  
mother-infant situation, based on the claim that one does not know a phenotype unless 386  
one challenges it. From their vantage point, ignoring the nature of the emotional bond 387  
between the infant and its mother may distort the interpretation of the infant's behavior. 388

At the other extreme, a comparative anatomist of behavior searching for the ancient 389  
phylogenetic origins of exploratory behavior would prioritize structure (Raff 2012; 390  
Gomez-Marin et al. 2016), and view the mother-infant situation as a basic, natural 391  
situation requiring structural characterization and understanding before rushing into the 392  
application of experimental perturbations. In this view, analysis of the basic situation 393  
across the phylogenetic scale in reference to origin-related exploration (Golani & 394  
Benjamini 2018) would be fundamental and primary. From this vantage point, even the 395  
presence of mother would, in a way, be dispensable had there been an alternative way 396  
of studying the infant's exploration in the room by using an alternative attractor that 397  
would serve as a meaningful yet ethical origin and reference for the infant. From this 398  
perspective, challenging a phenotype before even isolating the perceptual quantities 399  
(order parameters) managed by it (Golani 1981; Powers 1973) would be senseless. 400

The fact that a controversy between structure-first and function-first paradigms prevails 401  
in the study of biological phenomena for almost three centuries (Appel 1987) implies 402  
that both hold a grain of truth. They can be viewed as complementary and/or useful 403  
depending on one's aims. There is no a priori objective way of choosing between the 404  
two paradigms, except for by comparing their respective predictive powers. But 405  
whereas the first paradigm has been extensively used in the study of mother-infant 406  
interaction, the use of the second paradigm in a human context is too young to be 407  
evaluated, constituting only a first step in this type of structural comparison. Still, the 408  
structure-first paradigm deserves a chance, having proven itself in the study of animal 409  
origin-related exploration (Golani & Benjamini 2018), and providing a common 410  
framework for the study of organisms as varied as fruit flies, mice, primates and human 411  
infants. 412

413  
*Current study:* Complementarily, here we studied human infant mother-related 414  
exploration in a phylogenetic perspective, prioritizing the analysis of its structure 415

(Amundson 2005), but in reference to mother. To accomplish this aim we focused on 416  
the scale of moment-by-moment (*actualgenese*; actual-genesis), using reports on close 417  
and remote taxonomic groups' origin-related behavior as background material. Given 418  
our aim, a main requirement we fulfilled was to represent behavior in a way that would 419  
be useful in comparisons across taxonomic groups of, for example arthropods and 420  
mammals, including primates. The plots of the paths traced by the infants fulfilled this 421  
requirement. Using improved tracking technology, it should, however, be enhanced in 422  
future studies with concurrent separate representation of progression, of trunk 423  
orientation, and of the relations and changes of relation among all the moving parts of 424  
the kinematic linkage (Eshkol & Harries 1998; Golani 2012) (clearly also including 425  
hands and head movement, facial expressions, gaze and vocalizations, as well as a 426  
continuous record of mother's visual attention, a highly important parameter (Sorce & 427  
Emde 1981): not examined in the current study). The highway methodology to 428  
deciphering the lived experience associated with the symptoms of sensory and motor 429  
differences (Donnellan et al. 2013) exhibited by the two respective groups of infants is 430  
a comprehensive Movement Notation analysis of the behavior (Eshkol 1958; Eshkol & 431  
Harries 1998), including the analysis of stereotypy (Golani et al. 1999). 432

Having analyzed the infants' path in the environment we then isolated what appear to 433  
be candidate natural particulate processes (Wagner 1996; Golani et al. 1979) that make 434  
up the path in arthropods (Cohen et al. 2015) and vertebrates (Drai et al. 2000; Fonio et 435  
al. 2009; Golani & Benjamini 2018), constituting the elementary morphological 436  
characters of origin-related exploration (Gomez-Marin et al. 2015): progression 437  
segments and staying in place (lingering) episodes (Drai & Golani 2001), excursions 438  
(Eilam & Golani 1989; Tchernichovski et al. 1998; Benjamini et al. 2011; Drai & 439  
Golani 2001), and natural origins in reference to which the excursions are performed 440  
(Golani 2012) (see *Excursions versus one un-partitioned path*). This organized structure 441  
(Golani & Benjamini 2018) is used both in the same and in different organisms for 442  
different functions, such as management of novelty (Gordon et al. 2014) and of arousal 443  
(Fonio et al. 2009), socialization (Hinde & Simpson 1975) foraging (Woodgate et al. 444  
2016), as well as the functions ascribed to human infants' behavior (attachment, etc.). 445  
One major side benefit of this type of representation and analysis is that it is inherently 446  
translational, presumably consisting of the same cross-phyletic behavior (Golani & 447  
Benjamini 2018). 448

*Infant's management of attention and of perception in reference to a stationary mother:* 449  
We asked the seated mother to let her infant slide down from her lap and for her to 450  
remain in place across the half hour session, while we obtained a continuous track of 451  
the infant's behavior on the path scale. Leaving the infants to their own devices had a 452  
profound effect on their behavior. Finding themselves in a novel, relatively pleasant 453  
environment, without being continuously bombarded by social stimuli, yet under the 454  
relatively silent visual attention of mother (only one or two of the mothers sporadically 455  
sank into reflection), the infants were entrusted with the full management, at their own 456  
pace and for an extended period of time, of their own location, distance, opposition 457  
(Yaniv & Golani 1987; Eshkol 1958) contact, and extent of engagement with mother, 458  
furniture, and toys, disclosing to the observer through their behavior the endogenous 459  
constraints that shaped their attention, perception, and engagement with the physical 460  
and parental environment. By mildly reducing the mother's retrieval response in a safe 461  
environment we uncovered commonalities as well as an unsuspected disparity between 462  
the TD and the NTD infants. 463

*A computational analysis of the number of visits to the most preferred places in TD 464  
versus NTD infants:* Making no prior assumptions regarding mother's significance we 465  
first established each infant's most preferred place in the environment, as reflected in 466  
the peak amount of cumulative time spent in it. To ascertain that the place was indeed 467  
preferred persistently across the whole session we also required that dwell-time would 468  
be incrementally accumulated in that place through a sequence of visits that would be 469  
more-or-less evenly spread across the session. Places presenting these features were 470  
located in mother's proximity in five of the six TD infants but in none of the NTD 471  
infants (figs. 2a, b). Having established the preference for mother's proximity in the TD 472  
infants, we then plotted in the order of performance the time of start, the duration, the 473  
time of end, and the extent of each of the infant entries into mother's proximity (Figs. 474  
3, 4). In addition, we calculated the number of visits to mother by establishing a 475  
customized (Benjamini et al. 2010) boundary for each infant-mother session (see 476  
"segmentation to excursions" in *Methods* and Fig. 5). Finally, we found that the TD 477  
infants paid a higher number of visits to mother at all distances regardless of where we 478  
had established a boundary (fig. S1). Most of the TDs' mothers were thus visited 479  
persistently across the session, whereas most of the NTDs' mothers were visited rarely 480  
and irregularly if at all (see boxplot summaries Fig. 7). 481

*Partitioning the flow into excursions.* Visits to mother were next used to partition the overall path into excursions that started and ended in mother's vicinity (vertical bars in Fig. 5a, b). The segmentation of the path into excursions reveals that the TD infants performed a median of  $12 \pm 5$  excursions per session whereas the NTDs perform  $3 \pm 3$ ; three of the NTD infants did not perform any excursions at all. Furthermore, the TDs come to extensive grips with mother, not only by physically touching her during visits (fig. 6) but also by climbing and thus deeply engaging her (Figs. 3,7). Some of the TD infants, like [Almog](#), performed relatively simple excursions composed of clear, relatively monotonical outbound and monotonical inbound portions in reference to mother: their exploratory path is tightly centered on mother. Others, like [Alon](#) perform both simple and complex excursions that include several non-monotonical back-and-forth shuttles (Fonio et al. 2009) on the inbound portion of the excursion. Nonetheless all the TDs' exploratory paths were tightly centered on mother.

*The importance of excursions in infant-mother relationship.* In TD human infants the excursions are both the units of exploration of the environment and the units of discourse with mother. They are repeated sequences of alternating interactive units of experience with mother and with the world, encompassing both the world and mother in the same excursion. Mother experience and world experience come in pairs. The excursion is a manner of interaction between infant and mother, a "schema-of-being-with-mother" (Stern 2009), managed mostly by the infant, who "makes love" with the environment and "rushes to tell mother", much like a playing together or a sharing-of-feeding episode. It is a sequence that takes on "a regular, almost canonical form that can become an internalized model used to evaluate current experiences" (Stern 2009). The "checking back pattern" is the most important fairly regular sign of beginning somato-psychic differentiation, according to Mahler, who considers it to be the most important normal pattern of cognitive and emotional development. Its central role is expected considering that for most of human and primate history infants were probably carried by their mothers, using mother as an origin during forays into the environment, unlike the infants of other mammalian orders that either follow mother or are nested, or being cached (Jones 1972). Examination of mother-related exploration from a phylogenetic perspective reveals that for human infants in specific contexts, origin, mother, and homebase are one.



*The ontogeny of primate infant mother-related excursions:* During the first postnatal 514  
period, mothers of monkeys, baboons, and chimpanzees carry their offspring 515  
continuously, until such time as the infant descends from mother, making increasingly 516  
longer excursions away from and back to her (Altmann 2001; Plooij 1984; Berman 517  
1980). In chimpanzees, starting from the 8<sup>th</sup> month and on, the infants make short 518  
excursions remaining within arm's reach from their mothers, and then, across months, 519  
gradually increase the frequency and maximal distance of excursions to the point that 520  
the mothers might be out of sight of the infant for extended durations (Plooij 1984). A 521  
similar growth in the frequency and extent of excursions has been documented for a 522  
variety of monkeys kept in captivity (van Lawick-Goodall 1968; Nicolson 1982; Pusey 523  
1978; Kaufmann 1966; Hinde & Simpson 1975; Rheingold & Eckerman 1970). Even 524  
in controversial rearing-in-isolation experiments, in which the monkeys were reared in 525  
the presence of artificial surrogate mothers (made of wire), the infants used the 526  
surrogate as their "base of operations", moving away to examine furniture in the 527  
environment and then returning to base (Harlow & Zimmermann 1959). 528

In all the mother-infant interactions in primates, both partners initiate departures and 529  
approaches, contributing to the management of distance and contact between them 530  
(Plooij 1984; Hinde & Simpson 1975). In rhesus monkeys, the relative proportion of 531  
infant initiated departures and approaches increases with age (Hinde & Spencer-Booth 532  
1967). One way by which infant chimpanzees manage the distance with mother is by 533  
whimpering and inducing retrieval (Plooij 1984). The human mother appears to retrieve 534  
the infant during the pre-walking stage less often than many other mammals do, being 535  
present in environments in which restraining and retrieving are less necessary. One third 536  
of the inbound trips in 10-month old human infant excursions did not end with actual 537  
physical contact: "to see seemed sufficient (Rheingold & Eckerman 1970) . Human 538  
infants, unlike many other mammals, venture to explore away from their mothers from 539  
the moment that any mode of locomotion becomes possible (Rheingold & Eckerman 540  
1970); they do not wait until they can creep or walk efficiently. 541

*The phylogenetic status of human infant mother-related exploration:* The claim that 542  
mother-related exploration is homological across the primates is supported by the 543  
distinct taxonomic distribution of the carrying plus using mother as origin plus shared 544  
alternation between progression and lingering, plus excursions, all vis-à-vis the 545  
distinctly different taxonomic distribution of following, nesting, and caching (Jones 546

1972). The claim that this behavior is homological to origin-related exploration in fruit 547  
flies, crustaceans, rodents, and fish is supported by the shared connectivity (Wagner 548  
1996; Saint-Hilaire 1822) characterizing this behavior across phyla. The wide range of 549  
functional contexts in which the same structure unfolds is an essential characteristic of 550  
evolutionarily conserved characters: in the context of developmental evolutionary 551  
biology origin-related behavior is a character identity (Wagner 1996) supporting 552  
different functions. Establishing the evolutionarily-conserved status of human infant 553  
mother-related exploration and of its constituents would provide a step forward in the 554  
search for a homeomorphic organization that might mediate this plan's architecture in 555  
the brain. 556

The paucity or absence of excursions in the NTD infants is remarkable in view of the 557  
universality of mother-related exploration in primates and the sharing of origin-related 558  
behavior in vertebrates and arthropods. In the absence of a preferred stable place, the 559  
NTD infants' paths could not be segmented into excursions: they were punctuated like 560  
those of the TDs paths by lingering episodes, but these episodes tended to be situated 561  
away from mother. As soon as the session started, both TDs and NTDs slid down from 562  
mother's lap and crawled away, but while the TDs tended to immediately progress back 563  
and forth in reference to mother, lingering briefly in several locations along the 564  
excursion's path, the NTDs performed an extended staying-in-place episode as soon as 565  
they reached a piece of furniture or a toy (Adva, Tom, Evyater and Shuval), or as they 566  
stopped in an empty space away from walls (Dean), and tended to stay in place at that 567  
location for extended durations (Fig. 5b). Such extended staying-in-place episodes are 568  
also performed by TD infants, but typically much later in the session, only after 569  
performing a sequence of short staying-in-place episodes (Fig. 5a Alon, Almog, Dan 570  
and Yoram). The paucity or absence of visits to mother in the NTDs does not 571  
necessarily imply ignoring mother: a preliminary analysis of infant gaze suggests that 572  
these infants gazed at mother from across the room at least as often as did the TD 573  
infants. The "glass wall" surrounding the NTD mothers (e.g., [Tom](#) and [Yuri](#)) appears 574  
to disclose a mixture of active avoidance of proximity, including partial or full evasion 575  
of physical contact with mother (fig. 6), and an enhanced focused attention on objects. 576

Left to their own devices under the extended *laissez-faire* attention of mother, the 577  
operational worlds of the NTD infants unfolded as a single, undividable, attentive yet 578  
haphazardly oriented (exhibiting no reference to an origin) slab of behavior. To the best 579  
of our knowledge no vertebrate or arthropod has been reported to date to exhibit such 580  
behavior, nor have we been able to identify an animal model, be it a fruit fly, a rodent, 581  
or a monkey, that performs active investigation of the environment without referring to 582  
an origin, or while being relatively free of the attraction of an origin. The search image 583  
portrayed by the present study for such model thus shapes up as an animal capable of 584  
switching origin-related behavior off. 585

The intriguing findings by the current study could perhaps lead us to associate the 586  
described behavior of the NTD infants with early signs of autism, as these infants were 587  
referred to the Mifne Center for Early Treatment of Autism for assessment and/or 588  
treatment. However, such a conclusion is beyond the capacity and confines of this 589  
study. In order to make such an association it would be necessary to replicate (Kafkafi 590  
et al. 2017) the study with large groups of TD and NTD infants, concurrently 591  
performing follow-up developmental tests at older ages, and screening for 592  
developmental disorders, including Autism Spectrum Disorders (ASD). 593

594

## *Experimental design & methods*

595

Subjects were twelve 8-12 month-old pre-walking infants recruited with their respective 596 mothers to participate in a videotaped half hour session conducted at the Mifne Center. 597 All infants were documented at the stage of stable crawling. Six of the subjects were 598 Typically Developing (TD) infants whose parents had volunteered to participate in the 599 experiment. None of the TD infant parents had raised any concerns regarding 600 developmental problems. The other six subjects were Non-Typically Developing (NTD) 601 infants who had applied to the Mifne center for developmental assessment and/or 602 treatment, following referrals by child neurologists (three infants) and expert clinicians 603 (three infants). The parents were asked to sign a form designed by us and approved by the 604 Ethics Committee of Tel Aviv University. The NTD infants underwent external expert 605 developmental assessments, including the verification of inclusion and exclusion, detailed 606 family history, perinatal, medical, and developmental history, and physical and 607 neurological checkups. For each trial the mother entered the trial room carrying her infant, 608 sat on a mattress in the periphery of the room, and then seated the infant next to her. The 609 mother had been requested to remain seated within the area of the mattress and allow the 610 infant to act freely for a 30-minute session. Not all sessions lasted for half an hour, with 611 some being stopped if the infant appeared to be distressed (see Figs. 5, 6). Two video 612 cameras, one capturing a static view of the whole room including the infant and the mother 613 (fig. 1), and the other zooming in on the infant and following it, were used across the 614 session. The static camera data were transformed to a top view (see below). Data were 615 prepared for segmentation (Hen et al. 2004; Draï et al. 2000; Draï & Golani 2001) and 616 were subjected to analysis by SEE, a publicly available Software for the Exploration of 617 Exploration developed and elaborated by us over the course of many years 618 ([www.tau.ac.il/~ilan99/see/](http://www.tau.ac.il/~ilan99/see/)) (Draï & Golani 2001). 619

*Room:* The infants were tracked in a medium-sized, 3.65m by 5.45m room. 620

*Tracking:* The tracking of the infant was done manually using a specifically dedicated 621 program in Matlab. The infant's location was tracked every ~15 frames; missing 622 coordinates were completed using linear interpolation. 623

We resorted to the use of manual tracking after exhausting other possibilities: different 624 tracking algorithms had failed due to bad image quality, multiple object moving and 625 the fact that an infant is a large object, so even when tracking was successful, there was 626 jitter across the infant's body. 627

*Transformation:* The room was videotaped from a high side view camera angle requiring a projective transformation to an exact overhead view that would replace the 2D coordinates in the video image (Fig. 1, left) to 2D coordinates in the world (Fig. 1, right). A projective transformation is an image-processing technique that finds the linear transformation from one coordinates basis to another. It was implemented in Matlab, by choosing 4-5 points (whose coordinates were known for both bases) and finding the projection matrix.

*Cumulative dwell- time maps (heat maps):* The construction of the heat maps involved several steps:

1. Obtaining the original coordinate data from the Matlab tracking.
2. Smoothing the coordinates using the SEE program (<https://www.tau.ac.il/~ilan99/see/>).
3. Dividing the room into a grid, in which each cell is a 1 (CM) \* 1 (CM), and calculating the time spent in each cell according to 2.
4. Smoothing the cells using 2d Gaussian smoother: calculating for each cell a new value according to the weighted average of the cell itself and its neighboring cells. The weights are given by the a 2d Gaussian distribution ( $\sigma^2 = 14, n = 63$ ) (fig. 8)
5. Finding local maxima of the smoothed coordinates and discarding the 96% of maxima's with lower values.
6. Calculating the number of visits to each local maximum, based upon the two concentric circles ( $r_{in} = 30, r_{out} = 50$ ) paradigm described below.

We used several distinct ways for visualizing and scoring the infants' visits to places and for segmenting the path traced by them across the session. We calculated the number of visits to peak dwell-time places across the room using the two concentric circles algorithm; we used engagement plots to visualize all the infant's entries into mother's close proximity, including their extent and duration; and we established a customized boundary for each mother's place in order to calculate the number of visits paid to mother and the number of excursions or round-trips performed from her into the environment.

*Using two concentric circles to calculate the number of visits to a place:* The number 659  
of visits to a circumscribed area could be calculated by selecting a location, tracing a 660  
radius around it, and counting the number of times the infant entered the defined 661  
circular area. However, small vacillations of the infant across the border of the circular 662  
area without actually crawling away and returning would count as distinct, multiple 663  
visits. To avoid this outcome, we defined two concentric circles, both centered around 664  
the same location of interest. A visit started when the infant entered the inner ( $r_{in}$ ) circle 665  
and ended when it exited the outer circle ( $r_{out}$ ). 666

*Engagement Plots:* The engagement plot exhibits the timing, duration, and extent of the 667  
infant's being in gear with mother and with furniture and doors in the room. Each set of 668  
concentric circles exhibits the behavior of a specific infant. Starting at twelve o'clock 669  
and proceeding clockwise for the session's duration, the arc traced on the circle's 670  
circumference and the colored section of the circle, designate the time of start, the time 671  
of end, the duration in session percentage, and the extent of the entry into mother's or 672  
any other large object's close proximity (the infant seemingly casts a shadow on the 673  
peripheral area separated from the circle by its entry). The color of the polygon stands 674  
for the visited object, with mother being colored in black. Furniture items are designated 675  
by specific colors. For radius  $R$ , time  $t$  and for object  $j$  a point is drawn according to 676  
 $I(D_{j,t} < R)$ ,  $D_{j,t}$  being the distance of the infant at time  $t$  from the center of object  $j$ . In 677  
order to compare multiple pieces of furniture of different sizes, the distance drawn on 678  
the plot are the distance of the infant from the object minus the radius of the object. See 679  
Figure S2. 680

*Segmentation to excursions:* To partition the infant's path across the session into 681  
excursions we needed to define for each mother the customized circumscribed place 682  
she occupied. The length of the radius tracing the boundary of mother's place in 683  
reference to mother's center influenced the number of visits paid by the infant to mother 684  
across the session: the smaller the radius the fewer the number of visits. To obtain a 685  
customized place around the location defining mother's center, we progressively 686  
increased the radius circumscribing mother's location, dynamically changing the 687  
number of visits paid to mother. The minimal radius yielding a relatively stable number 688  
of visits for a vector of protracted lengths of radii was selected as the radius defining 689  
mother's place. We obtained the number of visits by using the two concentric circles 690  
method for each inner circle radius between 30 cm to 120 cm and an outer circle radius 691

that was larger by 1.1 than the inner circle radius, then searched for the longest radii 692  
interval in which there was no change in the number of visits, and then chose the 693  
smallest radius of that interval. 694

### **Data Availability** 695

All data generated or analyzed during this study can be found at 696  
<https://github.com/tfrostig/Infants-Analysis>. 697

### **Acknowledgments** 698

The development of SEE software has received further funding from the European 699  
Research Council: ERC grant agreement PSARPS{294519}. 700

This work continues the pioneering study conducted by Dr. Hani Monk-Vitelson 701  
supervised by Prof. Yuval Portugali and Prof. Chaim Pick of Tel-Aviv University and 702  
two of the current co-authors. We thank Hagar Yulzari, Dr. Neri Kafkafi, and Dr. Hillel 703  
Dr. Braude for their useful comments on the manuscript and Shana Salomon for the 704  
acquisition of the physical contact data. Ms Naomi Paz edited and proofread the 705  
manuscript. We thank the Mifne Center's personnel for their commitment, help, and 706  
enthusiasm throughout the study. 707

### **Bibliography:** 709

710  
Adolph, K. E. and Berger, S. E. (2007) 'Motor Development', in *Handbook of Child* 711  
*Psychology*. Hoboken, NJ, USA: John Wiley & Sons, Inc. doi: 712  
10.1002/9780470147658.chpsy0204. 713

Ainsworth, M. D. S. (1969) 'Object relations, dependency, and attachment: A 714  
theoretical review of the infant-mother relationship', *Child development*. JSTOR, pp. 715  
969–1025. 716

Ainsworth, M. D. S. *et al.* (2015) *A psychological study of the strange situation*. 717  
Psychology Press. 718

Ainsworth, M. S. D. S. and Bowlby, J. (1991) 'An ethological approach to personality 719  
development.', *American psychologist*. American Psychological Association, 46(4), p. 720  
333. 721

Alonim, H. (2004) 'The Mifne Method — ISRAEL. Early intervention in the 722  
treatment of autism/PDD: A therapeutic programme for the nuclear family and their 723  
child', *Journal of Child & Adolescent Mental Health*. Taylor & Francis Group, 16(1), 724  
pp. 39–43. doi: 10.2989/17280580409486562. 725

Altmann, J. (2001) *Baboon mothers and infants*. University of Chicago Press. 726



|                                                                                                                                                                                                                                                                                                                           |                          |
|---------------------------------------------------------------------------------------------------------------------------------------------------------------------------------------------------------------------------------------------------------------------------------------------------------------------------|--------------------------|
| Altmann, J. and Samuels, A. (1992) ‘Costs of maternal care: infant-carrying in baboons’, <i>Behavioral Ecology and Sociobiology</i> . Springer, 29(6), pp. 391–398.                                                                                                                                                       | 727<br>728               |
| Amundson, R. (2005) <i>The changing role of the embryo in evolutionary thought: roots of evo-devo</i> . Cambridge University Press.                                                                                                                                                                                       | 729<br>730               |
| Appel, T. A. (1987) <i>The Cuvier-Geoffroy debate: French biology in the decades before Darwin</i> . Oxford University Press on Demand.                                                                                                                                                                                   | 731<br>732               |
| Benjamini, Y. <i>et al.</i> (2010) ‘Ten ways to improve the quality of descriptions of whole-animal movement’, <i>Neuroscience &amp; Biobehavioral Reviews</i> . Elsevier, 34(8), pp. 1351–1365.                                                                                                                          | 733<br>734<br>735        |
| Benjamini, Y. <i>et al.</i> (2011) ‘Quantifying the buildup in extent and complexity of free exploration in mice’, <i>Proceedings of the National Academy of Sciences</i> . National Acad Sciences, 108(Supplement 3), pp. 15580–15587. doi: 10.1073/pnas.1014837108.                                                     | 736<br>737<br>738<br>739 |
| Benjamini, Y. and Hochberg, Y. (1995) ‘Controlling the False Discovery Rate: A Practical and Powerful Approach to Multiple Controlling the False Discovery Rate: a Practical and Powerful Approach to Multiple Testing’, <i>Journal of the royal statistical society. Series B (Methodological)</i> , 57(1), pp. 289–300. | 740<br>741<br>742<br>743 |
| Berman, C. M. (1980) ‘Mother-infant relationships among free-ranging rhesus monkeys on Cayo Santiago: a comparison with captive pairs’, <i>Animal Behaviour</i> . Elsevier, 28(3), pp. 860–873.                                                                                                                           | 744<br>745<br>746        |
| Bowlby, J. (2012) <i>A secure base</i> . Routledge.                                                                                                                                                                                                                                                                       | 747                      |
| Brown, L. E. (1966) ‘Home range and movement of small mammals’, <i>Symposia of the Zoological Society of London</i> , pp. 111–142.                                                                                                                                                                                        | 748<br>749               |
| Cohen, S., Benjamini, Y. and Golani, I. (2015) ‘Coping with space neophobia in <i>Drosophila melanogaster</i> : The asymmetric dynamics of crossing a doorway to the untrodden’, <i>PloS one</i> . Public Library of Science, 10(12), p. e0140207.                                                                        | 750<br>751<br>752        |
| Cooper, G. <i>et al.</i> (2011) ‘The circle of security intervention’, <i>Disorganized Attachment and Caregiving</i> , 318.                                                                                                                                                                                               | 753<br>754               |
| Donnellan, A. M., Hill, D. A. and Leary, M. R. (2013) ‘Rethinking autism: implications of sensory and movement differences for understanding and support’, <i>Frontiers in Integrative Neuroscience</i> . Frontiers, 6, p. 124. doi: 10.3389/fnint.2012.00124.                                                            | 755<br>756<br>757<br>758 |
| Drai, D., Benjamini, Y. and Golani, I. (2000) ‘Statistical discrimination of natural modes of motion in rat exploratory behavior.’, <i>Journal of neuroscience methods</i> , 96(2), pp. 119–31.                                                                                                                           | 759<br>760<br>761        |
| Drai, D. and Golani, I. (2001) ‘SEE: a tool for the visualization and analysis of rodent exploratory behavior’, <i>Neuroscience &amp; Biobehavioral Reviews</i> . Pergamon, 25(5), pp. 409–426. doi: 10.1016/S0149-7634(01)00022-7.                                                                                       | 762<br>763<br>764        |
| Eilam, D. and Golani, I. (1989) ‘Home base behavior of rats ( <i>Rattus norvegicus</i> ) exploring a novel environment.’, <i>Behavioural brain research</i> , 34(3), pp. 199–211.                                                                                                                                         | 765<br>766               |
| Eshkol, N. (1958) <i>Movement notation</i> . Weidenfeld and Nicolson.                                                                                                                                                                                                                                                     | 767                      |

|                                                                                                                                                                                                                                                                                               |                          |
|-----------------------------------------------------------------------------------------------------------------------------------------------------------------------------------------------------------------------------------------------------------------------------------------------|--------------------------|
| Eshkol, N. and Harries, J. (1998) ‘Eshkol-Wachman Movement Notation: A Survey’,<br><i>Eshkol-Wachman Movement Notation: A Survey</i> .                                                                                                                                                        | 768<br>769               |
| Fonio, E., Benjamini, Y. and Golani, I. (2009) ‘Freedom of movement and the<br>stability of its unfolding in free exploration of mice’, <i>Proceedings of the national<br/>academy of sciences</i> . National Academy of Sciences, 106(50), pp. 21335–21340. doi:<br>10.1073/pnas.0812513106. | 770<br>771<br>772<br>773 |
| Fritts, S. H. and Mech, L. D. (1981) ‘Dynamics, Movements, and Feeding Ecology of<br>a Newly Protected Wolf Population in Northwestern Minnesota’, <i>Wildlife<br/>Monographs</i> . Wiley Wildlife Society, pp. 3–79. doi: 10.2307/3830611.                                                   | 774<br>775<br>776        |
| Gibson, E. J. (1988) ‘Exploratory behavior in the development of perceiving, acting,<br>and the acquiring of knowledge.’, <i>Ann. Rev. Psychol</i> , 39, pp. 1–41.                                                                                                                            | 777<br>778               |
| Golani, I. (1981) ‘The search for invariants in motor behavior’, <i>Behavioral<br/>development</i> , pp. 372–390.                                                                                                                                                                             | 779<br>780               |
| Golani, I. (2012) ‘The developmental dynamics of behavioral growth processes in<br>rodent egocentric and allocentric space’, <i>Behavioural Brain Research</i> , 231(2), pp.<br>309–316. doi: 10.1016/j.bbr.2012.01.039.                                                                      | 781<br>782<br>783        |
| Golani, I. and Benjamini, Y. (2018) ‘Home Base’, <i>Encyclopedia of Animal Cognition<br/>and Behavior</i> . Springer, Cham.                                                                                                                                                                   | 784<br>785               |
| Golani, I., Kafkafi, N. and Drai, D. (1999) ‘Phenotyping stereotypic behaviour:<br>collective variables, range of variation and predictability’, <i>Applied Animal Behaviour<br/>Science</i> . Elsevier, 65(3), pp. 191–220. doi: 10.1016/S0168-1591(99)00085-4.                              | 786<br>787<br>788        |
| Golani, I., Wolgin, D. L. and Teitelbaum, P. (1979) ‘A proposed natural geometry of<br>recovery from akinesia in the lateral hypothalamic rat’, <i>Brain research</i> . Elsevier,<br>164(1–2), pp. 237–267.                                                                                   | 789<br>790<br>791        |
| Gomez-Marin, A. <i>et al.</i> (2015) ‘Searching for behavioral homologies: Shared<br>generative rules for expansion and narrowing down of the locomotor repertoire in<br>Arthropods and Vertebrates’, <i>arXiv preprint arXiv:1507.07270</i> .                                                | 792<br>793<br>794        |
| Gomez-Marin, A. <i>et al.</i> (2016) ‘Generative rules of Drosophila locomotor behavior as<br>a candidate homology across phyla’, <i>Nature Publishing Group</i> . doi:<br>10.1038/srep27555.                                                                                                 | 795<br>796<br>797        |
| Gordon, G., Fonio, E. and Ahissar, E. (2014) ‘Emergent exploration via novelty<br>management’, <i>Journal of Neuroscience</i> . Soc Neuroscience, 34(38), pp. 12646–12661.                                                                                                                    | 798<br>799               |
| Harlow, H. F. and Zimmermann, R. R. (1959) ‘Affectional responses in the infant<br>monkey’, <i>Science</i> . JSTOR, 130(3373), pp. 421–432.                                                                                                                                                   | 800<br>801               |
| Hen, I. <i>et al.</i> (2004) ‘The dynamics of spatial behavior: how can robust smoothing<br>techniques help?’, <i>Journal of neuroscience methods</i> , 133(1–2), pp. 161–72.                                                                                                                 | 802<br>803               |
| Hinde, R. A. and Simpson, M. J. A. (1975) ‘Qualities of mother-infant relationships in<br>monkeys’, in <i>Ciba Foundation Symposium</i> , pp. 39–67.                                                                                                                                          | 804<br>805               |
| Hinde, R. A. and Spencer-Booth, Y. (1967) ‘The behaviour of socially living rhesus<br>monkeys in their first two and a half years’, <i>Animal Behaviour</i> . Elsevier, 15(1), pp.<br>169–196.                                                                                                | 806<br>807<br>808        |

|                                                                                                                                                                                                                                                                                                           |                          |
|-----------------------------------------------------------------------------------------------------------------------------------------------------------------------------------------------------------------------------------------------------------------------------------------------------------|--------------------------|
| Hoffmann, G. (1984) ‘Orientation behaviour of the desert woodlouse <i>Hemilepistus reaumuri</i> : adaptations to ecological and physiological problems’, <i>In Symposia of the Zoological Society of London</i> , 53, pp. 405–422.                                                                        | 809<br>810<br>811        |
| Jones, N. B. (1972) ‘Categories of child-child interaction’, in <i>Ethological studies of child behaviour</i> . Cambridge University Press Cambridge, pp. 97–127.                                                                                                                                         | 812<br>813               |
| Kafkafi, N. <i>et al.</i> (2017) ‘Addressing reproducibility in single-laboratory phenotyping experiments’, <i>Nature Methods</i> . Nature Publishing Group, 14(5), pp. 462–464. doi: 10.1038/nmeth.4259.                                                                                                 | 814<br>815<br>816        |
| Kaufmann, J. H. (1966) ‘Behavior of infant rhesus monkeys and their mothers in a free-ranging band’, <i>Zoologica (New York)</i> , 51, pp. 17–28.                                                                                                                                                         | 817<br>818               |
| Kretch, K. S. and Adolph, K. E. (2017) ‘The organization of exploratory behaviors in infant locomotor planning’, <i>Developmental Science</i> . Wiley Online Library, 20(4). doi: 10.1111/desc.12421.                                                                                                     | 819<br>820<br>821        |
| Kretch, K. S., Franchak, J. M. and Adolph, K. E. (2014) ‘Crawling and Walking Infants See the World Differently’, <i>Child Development</i> . Wiley/Blackwell (10.1111), 85(4), pp. 1503–1518. doi: 10.1111/cdev.12206.                                                                                    | 822<br>823<br>824        |
| van Lawick-Goodall, J. (1968) ‘The behaviour of free-living chimpanzees in the Gombe Stream Reserve’, <i>Animal behaviour monographs</i> . Elsevier, 1, pp. 161–IN12.                                                                                                                                     | 825<br>826               |
| Loewen, I., Wallace, D. G. and Whishaw, I. Q. (2005) ‘The development of spatial capacity in piloting and dead reckoning by infant rats: use of the huddle as a home base for spatial navigation’, <i>Developmental psychobiology</i> . Wiley Online Library, 46(4), pp. 350–361. doi: 10.1002/dev.20063. | 827<br>828<br>829<br>830 |
| Mahler, M. S., Pine, F. and Bergman, A. (1975) ‘The Psychological Birth of the Human Infant. Symbiosis and Individuation. New York (Basic Books) 1975.’                                                                                                                                                   | 831<br>832               |
| Martin, M. and Rudiger, W. (1988) ‘Path Integreation in Desert Ants, <i>Cataglyphis fortis</i> ’, <i>Proceedings of the national academy of sciences</i> , 85(14), pp. 5287–5290.                                                                                                                         | 833<br>834               |
| Nicolson, N. A. (1982) <i>Weaning and the development of independence in olive baboons</i> . ProQuest Information & Learning.                                                                                                                                                                             | 835<br>836               |
| Plooij, F. X. (1984) <i>The behavioral development of free-living chimpanzee babies and infants</i> . Ablex Publishing Corp.                                                                                                                                                                              | 837<br>838               |
| Powers, W. T. (1973) <i>Behavior: The control of perception</i> . Aldine Chicago.                                                                                                                                                                                                                         | 839                      |
| Pusey, A. (1978) ‘Age changes in the mother-offspring association of wild chimpanzees’, <i>Recent advances in primatology</i> , 1, pp. 119–123.                                                                                                                                                           | 840<br>841               |
| Raff, R. A. (2012) <i>The shape of life: genes, development, and the evolution of animal form</i> . University of Chicago Press.                                                                                                                                                                          | 842<br>843               |
| Rheingold, H. L. and Eckerman, C. O. (1970) ‘The infant separates himself from his mother’, <i>Science</i> . JSTOR, 168(3927), pp. 78–83.                                                                                                                                                                 | 844<br>845               |
| van de Rijt-Plooij, H. H. C. and Plooij, F. X. (1987) ‘Growing independence, conflict and learning in mother-infant relations in free-ranging chimpanzees’, <i>Behaviour</i> . Brill, 101(1), pp. 1–86.                                                                                                   | 846<br>847<br>848        |

|                                                                                                                                                                                                                                                                                                  |                          |
|--------------------------------------------------------------------------------------------------------------------------------------------------------------------------------------------------------------------------------------------------------------------------------------------------|--------------------------|
| Saint-Hilaire, E. G. (1822) <i>Philosophie anatomique (Vol. 2)</i> . Méquignon-Marvis.                                                                                                                                                                                                           | 849                      |
| Schore, A. N. (2015) <i>Affect regulation and the origin of the self: The neurobiology of emotional development</i> . Routledge.                                                                                                                                                                 | 850<br>851               |
| Solomon, J. and George, C. (1999) ‘The measurement of attachment security in infancy and childhood’, in Cassidy, J. and Shaver, P. R. (eds) <i>Handbook of attachment: Theory, research, and clinical applications</i> . Rough Guides, pp. 287–316.                                              | 852<br>853<br>854        |
| Sorce, J. F. and Emde, R. N. (1981) ‘Mother’s Presence Is Not Enough: Effect of Emotional Availability on Infant Exploration’, <i>Developmental Psychology</i> , 17(6), pp. 737–745. doi: 10.1037/0012-1649.17.6.737.                                                                            | 855<br>856<br>857        |
| Soska, K. C. <i>et al.</i> (2010) ‘Spontaneous Transitions Between Crawling And Sitting Postures During Infant Locomotion’, <i>Developmental Psychobiology</i> . <i>Developmental Psychobiology</i> , 52(7), p. 718.                                                                             | 858<br>859<br>860        |
| Stern, D. N. (2009) <i>The first relationship</i> . Harvard University Press.                                                                                                                                                                                                                    | 861                      |
| Stewart, A. <i>et al.</i> (2010) ‘Homebase behavior of zebrafish in novelty-based paradigms’, <i>Behavioural Processes</i> , 85(2), pp. 198–203. doi: 10.1016/j.beproc.2010.07.009.                                                                                                              | 862<br>863<br>864        |
| Stewart, A. <i>et al.</i> (2011) ‘Phenotyping of zebrafish homebase behaviors in novelty-based tests’, in <i>Zebrafish neurobehavioral protocols</i> . Springer, pp. 143–155. doi: 10.1007/978-1-60761-953-6_12.                                                                                 | 865<br>866<br>867        |
| Tchernichovski, O., Benjamini, Y. and Golani, I. (1998) ‘The dynamics of long-term exploration in the rat’, <i>Biological cybernetics</i> . Springer, 78(6), pp. 423–432.                                                                                                                        | 868<br>869               |
| Trevarthen, C. (1979) ‘Communication and cooperation in early infancy: A description of primary intersubjectivity’, <i>Before speech: The beginning of interpersonal communication</i> , 1, pp. 530–571.                                                                                         | 870<br>871<br>872        |
| Vitelson, H. (2005) <i>Spatial Behavior of Pre-Walking infants: Patterns of Locomotion in a Novel Environment</i> . Tel Aviv University.                                                                                                                                                         | 873<br>874               |
| Wagner, G. P. G. P. (1996) ‘Homologues, natural kinds and the evolution of modularity’, <i>American Zoologist</i> . Oxford University Press UK, 36(1), pp. 36–43.                                                                                                                                | 875<br>876               |
| Woodgate, J. L. <i>et al.</i> (2016) ‘Life-long radar tracking of bumblebees’, <i>PloS one</i> . Edited by S. C. Pratt. Public Library of Science, 11(8), p. e0160333. doi: 10.1371/journal.pone.0160333.                                                                                        | 877<br>878<br>879        |
| Yaniv, Y. and Golani, I. (1987) ‘Superiority and Inferiority: a Morphological Analysis of Free and Stimulus Bound Behaviour in Honey Badger ( <i>Mellivora capensis</i> ) Interactions’, <i>Ethology</i> . Blackwell Publishing Ltd, 74(2), pp. 89–116. doi: 10.1111/j.1439-0310.1987.tb00924.x. | 880<br>881<br>882<br>883 |
|                                                                                                                                                                                                                                                                                                  | 884                      |
|                                                                                                                                                                                                                                                                                                  | 885                      |
| <b>Supplementary Information</b>                                                                                                                                                                                                                                                                 | 886                      |
|                                                                                                                                                                                                                                                                                                  | 887                      |
| <i>Quantitative examination of dwell time distribution in reference to mother.</i>                                                                                                                                                                                                               | 888                      |

889

To quantify dwell-time, we plotted the average time spent across the session for the 890  
whole range of distances from mother's center to a distance of up to 1.2m. The results 891  
reveal that the TD infants spent significantly more time than the NTD infants within 892  
the entire range marking mother's vicinity. Only the exceptional TD infant Alexey (see 893  
*Methods*) shows the lower values characterizing the NTD infants; the lowest curve for 894  
both number of visits and dwell-time in the TD infants belongs to Alexey. Using 895  
permutations to test the difference between the two average curves is significant (p- 896  
value 0.029, the average difference between the curves is 0.19). 897

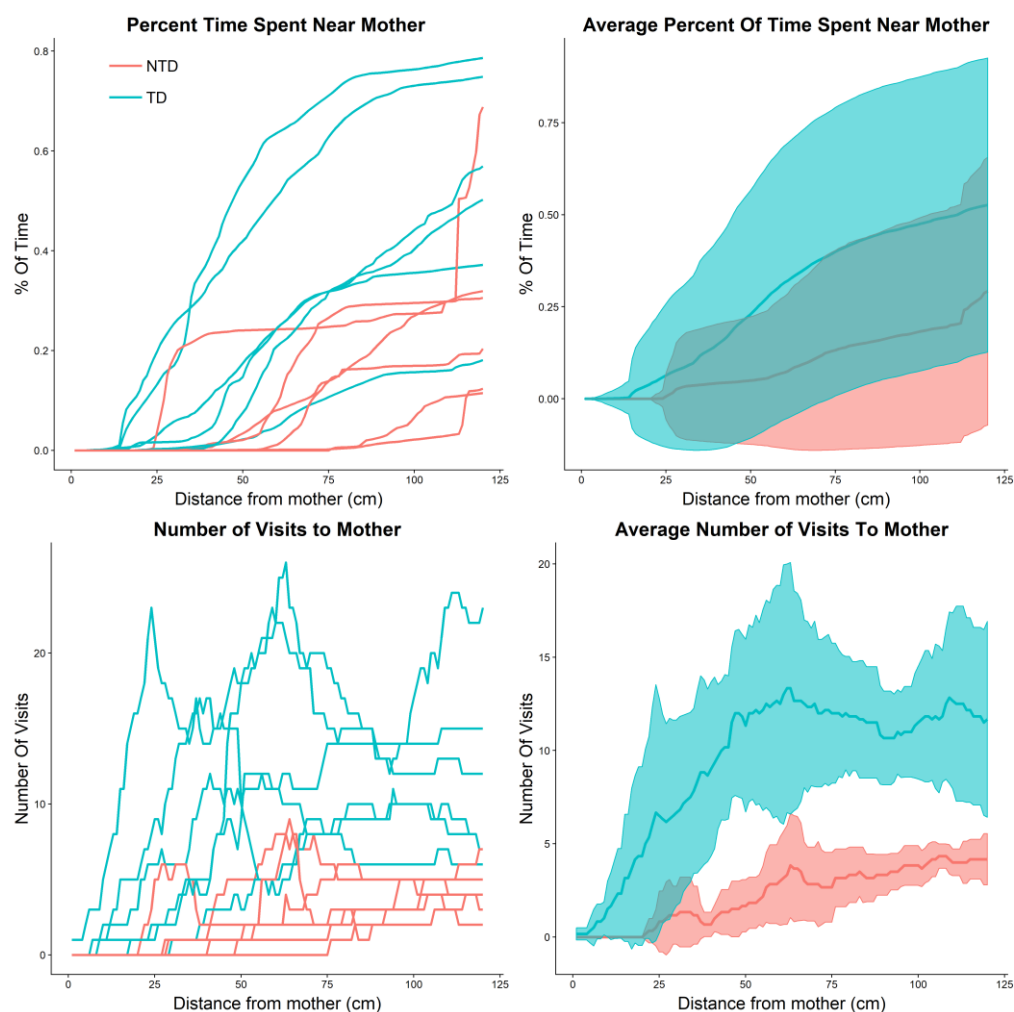

898

899

900

901

902

903

904

905

906

907

908

909

910

911

912

**Figure S1 a, b, c, d.** Percentage of time spent in mother's vicinity. **c, d:** Number of visits to 913  
mother as a function of distance from mother. The CI for figures **b** and **d** was obtained using 914  
the normal approximation. 915

*Quantitative summary of number of visits-to-places distribution in reference to mother.* 916

Plotting the number of visits paid by each of the infants to the mother as we dynamically 917  
changed the inner radius of the two circles algorithm (the outer radius was kept at 1.1 918



of the inner radius) reveals that the number of visits to mother are higher for the TD 919  
compared to the NTD infants for the whole range of radii up to 1.2m. Since excursions 920  
are punctuated by visits to mother (see section *The infants' management of distance* 921  
*from mother*), it also follows that for all considered distances from mother the TD 922  
infants exhibit more excursions than the NTD infants. Using permutations to test the 923  
difference between the average excursions curves of the TD and NTD is highly 924  
significant (p-value - 0.005, the average difference between the curves is 7.23 visits). 925

### Engagement Plots. 926 927

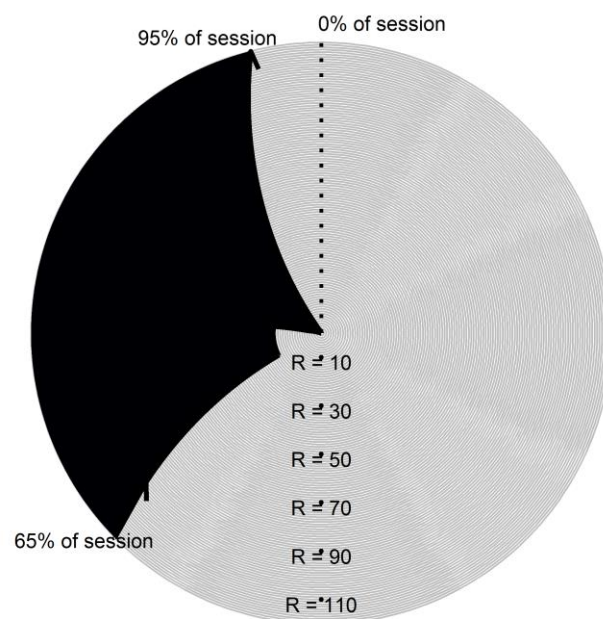

**Figure S2.** Illustration of an engagement plot including annotation. The black wedge 928  
represents the % of time the child spent near mother; the concentric circles radii represent the 929  
distance of the infant from mother; and the length of the arc at the respective radius represents 930  
the % of time spent at that distance (or greater). 931  
932  
933

### Videos. 934 935

Animations of the infants' sessions were created and can be viewed using the following 936  
links. Note that the infant sometimes appears to be beyond the boundary of the room, 937  
which is due to the tracking of the child and then transforming the image, so that when 938  
the infant is standing it appears that the tracker is beyond the boundary. The mother's 939  
size changes from video to video, due to the way in which each mother sat (some were 940  
almost supine). 941

The infant's center of mass in the current frame is represented by a black circle; 942  
 movement in the current excursion is segmented into lingering segments; progression 943  
 segments are represented by blue and red colors respectively, past excursions are shown 944  
 in grey; the mother location is in green and the rest of the furniture items are in black. 945

*TD infants.* 946

[Video S1 – Alon animation of excursions](#) 947

[Video S2 – Omri animation of excursions](#) 948

[Video S3 – Almog animation of excursions](#) 949

[Video S4 – Dan animation of excursions](#) 950

[Video S5 – Alexey animation of excursions](#) 951

[Videos S6 – Yoram animation of excursions](#) 952

*NTD infants.* 953

[Video S7 – Adva animation of excursions](#) 954

[Video S8 – Dean animation of excursions](#) 955

[Video S9 – Evyatar animation of excursions](#) 956

[Video S10 – Tom animation of excursions](#) 957

[Video S11 – Yuri animation of excursions](#) 958

[Video S12 – Shuval animation of excursions](#) 959

960

*Statistical Testing* 961

Tables for all tests conducted with additional information. 962

All tests are conducted with  $n_x = 6$  TD infants and  $n_y = 6$  NTD infants. SD is the 963

pooled standard deviation -  $s_p^2 = \frac{(n_x-1)s_x^2 + (n_y-1)s_y^2}{n_x+n_y-2}$ . 964

*The infants' management of distance from mother.* 965

| Test – Wilcoxon rank-sum test | P-value  | Means Difference<br>$\bar{x} - \bar{y}$ | Statistic (W) | SD<br>$s_p$ | Effect Size<br>$\frac{\text{Median}(x_i - y_j)}{s_p}$ |
|-------------------------------|----------|-----------------------------------------|---------------|-------------|-------------------------------------------------------|
| # of Excursions               | 0.004922 | 8.5                                     | 36            | 2.783       | 3.233                                                 |

966

967



*Endpoint Summaries.*

968

| Test – Wilcoxon rank-sum test          | P-value   | Adjusted p-value (BH) | Means Difference $\bar{x} - \bar{y}$ | Statistic (W) | SD $s_p$ | Effect Size $\frac{\text{Median}(x_i - y_j)}{s_p}$ |
|----------------------------------------|-----------|-----------------------|--------------------------------------|---------------|----------|----------------------------------------------------|
| # of Excursions 100 (cm)               | 0.0046242 | 0.030303              | 7.66                                 | 36            | 2.834    | 0.511                                              |
| % of time near mother 100 (cm)         | 0.0259740 | 0.0350674             | 1.69                                 | 32            | 1.224    | 1.23                                               |
| Progression speed                      | 0.0411255 | 0.0411255             | 7.29                                 | 31            | 5.416    | 0.243                                              |
| % of room covered                      | 0.0151515 | 0.0350674             | 0.02                                 | 33            | 0.011    | 121.904                                            |
| Speed outside mother vicinity 100 (cm) | 0.0259740 | 0.350674              | 3.12                                 | 32            | 1.864    | 0.674                                              |
| # of Contact episodes                  | 0.0300578 | 0.0350674             | 11.66                                | 32            | 7.863    | 0.138                                              |
| % of Contact time                      | 0.006580  | 0.030303              | 0.02                                 | 34            | 0.152    | 7.982                                              |

969

*Quantitative examination of dwell time distribution in reference to mother and*

970

*Quantitative summary of number of visits-to-places distribution in reference to mother*

971

972

| Test (Comparing mean curves - permutation) | P-value  | Adjusted p-value (BH) | Means Difference $\bar{x} - \bar{y}$ |
|--------------------------------------------|----------|-----------------------|--------------------------------------|
| % Time spent near mother ~ radius          | 0.028971 | 0.028971              | 0.212                                |
| # Excursions to mother ~ radius            | 0.004995 | 0.009990              | 7.612                                |

973
